# Supplementary material for: Modeling Potential Habitat for Amblyomma Tick Species in California
Source: PubMed Central journal article supplement (PMC6681388; doi:10.3390/insects10070201), 2019-07-08
Supplement: insects-10-00201-s001.pdf [file insects-10-00201-s001.pdf]

**Table S1.** Each geolocation recorded for ticks in the species *Amblyomma americanum* in the literature and publicly available online databases.

| Latitude | Longitude | Year | Data Source | Reference         |
|----------|-----------|------|-------------|-------------------|
| 46.25    | -114.17   | 1966 |             | Australian Museum |
| 28.31    | -82.46    | 2011 |             | BISON             |
| 28.51    | -81.32    | 2009 |             | BISON             |
| 29.68    | -82.36    | 2006 |             | BISON             |
| 29.68    | -82.36    | 2006 |             | BISON             |
| 29.99    | -100.31   | 2009 |             | BISON             |
| 29.99    | -81.86    | 2014 |             | BISON             |
| 29.99    | -81.86    | 2014 |             | BISON             |
| 30.24    | -97.69    | 2005 |             | BISON             |
| 30.46    | -84.28    | 2017 |             | BISON             |
| 32.60    | -85.35    | 2008 |             | BISON             |
| 32.60    | -85.35    | 2008 |             | BISON             |
| 32.80    | -79.94    | 2012 |             | BISON             |
| 33.42    | -88.88    | 2016 |             | BISON             |
| 33.55    | -86.90    | 2013 |             | BISON             |
| 33.70    | -84.77    | 2011 |             | BISON             |
| 33.95    | -83.37    | 2016 |             | BISON             |
| 34.72    | -96.69    | 2013 |             | BISON             |
| 34.72    | -96.69    | 2013 |             | BISON             |
| 34.72    | -96.69    | 2015 |             | BISON             |
| 35.05    | -78.83    | 2004 |             | BISON             |
| 35.05    | -78.83    | 2004 |             | BISON             |
| 35.05    | -78.83    | 2004 | BISON       | BISON             |
| 35.05    | -78.83    | 2005 |             | BISON             |
| 35.05    | -78.83    | 2006 |             | BISON             |
| 35.21    | -97.32    | 2009 |             | BISON             |
| 35.21    | -97.32    | 2009 |             | BISON             |
| 35.79    | -78.65    | 2011 |             | BISON             |
| 35.79    | -78.65    | 2012 |             | BISON             |
| 35.79    | -78.65    | 2011 |             | BISON             |
| 35.91    | -93.22    | 2009 |             | BISON             |
| 35.97    | -77.99    | 2009 |             | BISON             |
| 35.99    | -83.94    | 2015 |             | BISON             |
| 36.08    | -79.79    | 2011 |             | BISON             |
| 36.34    | -94.26    | 2015 |             | BISON             |
| 36.62    | -96.41    | 2007 |             | BISON             |
| 36.62    | -96.41    | 2008 |             | BISON             |
| 36.62    | -96.41    | 2008 |             | BISON             |
| 36.62    | -96.41    | 2008 |             | BISON             |
| 36.62    | -96.41    | 2008 |             | BISON             |
| 36.62    | -96.41    | 2008 |             | BISON             |
| 36.62    | -96.41    | 2008 |             | BISON             |
| 36.62    | -96.41    | 2008 |             | BISON             |
| 36.62    | -96.41    | 2009 |             | BISON             |
| 36.62    | -96.41    | 2009 |             | BISON             |
| 36.62    | -96.41    | 2009 |             | BISON             |

|       |         |               |                                 |
|-------|---------|---------------|---------------------------------|
| 36.62 | -96.41  | 2009          | BISON                           |
| 36.62 | -96.41  | 2009          | BISON                           |
| 36.62 | -96.41  | 2011          | BISON                           |
| 36.62 | -96.41  | 2012          | BISON                           |
| 36.62 | -96.41  | 2012          | BISON                           |
| 37.36 | -77.05  | 2014          | BISON                           |
| 37.62 | -84.87  | 2016          | BISON                           |
| 37.83 | -78.28  | 2011          | BISON                           |
| 37.97 | -85.70  | 2016          | BISON                           |
| 37.97 | -85.70  | 2016          | BISON                           |
| 38.22 | -75.31  | 2014          | BISON                           |
| 38.43 | -88.43  | 2007          | BISON                           |
| 38.68 | -75.34  | 2012          | BISON                           |
| 38.83 | -76.85  | 2017          | BISON                           |
| 38.88 | -94.82  | 2009          | BISON                           |
| 38.99 | -76.56  | 2015          | BISON                           |
| 38.99 | -76.56  | 2015          | BISON                           |
| 39.01 | -94.34  | 2015          | BISON                           |
| 39.16 | -86.52  | 2011          | BISON                           |
| 39.20 | -84.54  | 2013          | BISON                           |
| 39.58 | -75.64  | 2013          | BISON                           |
| 39.80 | -74.96  | 2011          | BISON                           |
| 39.80 | -74.96  | 2012          | BISON                           |
| 39.80 | -74.96  | 2012          | BISON                           |
| 39.80 | -74.96  | 2016          | BISON                           |
| 39.88 | -74.66  | 2008          | BISON                           |
| 39.88 | -74.66  | 2009          | BISON                           |
| 39.88 | -74.66  | 2013          | BISON                           |
| 39.97 | -75.75  | 2014          | BISON                           |
| 40.75 | -87.83  | 2015          | BISON                           |
| 40.94 | -72.69  | 2006          | BISON                           |
| 40.94 | -72.69  | 2009          | BISON                           |
| 40.94 | -72.69  | 2009          | BISON                           |
| 40.94 | -72.69  | 2009          | BISON                           |
| 41.40 | -71.62  | 2012          | BISON                           |
| 42.48 | -71.40  | 2014          | BISON                           |
| 43.43 | -70.67  | 2013          | BISON                           |
| 44.65 | -71.29  | 2006          | BISON                           |
| 27.45 | -80.33  | Not specified | Illinois Natural History Survey |
| 28.00 | -80.55  | Not specified | Illinois Natural History Survey |
| 28.02 | -81.73  | Not specified | Illinois Natural History Survey |
| 28.87 | -81.27  | Not specified | Illinois Natural History Survey |
| 31.14 | -99.33  | Not specified | Illinois Natural History Survey |
| 34.50 | -106.00 | Not specified | Illinois Natural History Survey |
| 34.50 | -93.06  | 1952          | Illinois Natural History Survey |
| 36.26 | -90.97  | 1962          | Illinois Natural History Survey |
| 36.32 | -91.48  | 1962          | Illinois Natural History Survey |
| 36.33 | -94.12  | Not specified | Illinois Natural History Survey |
| 36.33 | -94.12  | Not specified | Illinois Natural History Survey |
| 37.25 | -90.53  | Not specified | Illinois Natural History Survey |

|       |         |               |       |                                        |
|-------|---------|---------------|-------|----------------------------------------|
| 37.38 | -88.66  | 1965          |       | Illinois Natural History Survey        |
| 37.69 | -88.92  | Not specified |       | Illinois Natural History Survey        |
| 37.76 | -89.08  | 1966          |       | Illinois Natural History Survey        |
| 37.82 | -90.24  | 1958          |       | Illinois Natural History Survey        |
| 38.43 | -89.48  | 1988          |       | Illinois Natural History Survey        |
| 39.58 | -88.65  | 1999          |       | Illinois Natural History Survey        |
| 40.11 | -88.21  | 1957          |       | Illinois Natural History Survey        |
| 40.11 | -88.21  | 1957          |       | Illinois Natural History Survey        |
| 42.28 | -88.44  | 1956          |       | Illinois Natural History Survey        |
| 46.25 | -114.16 | Not specified |       | Illinois Natural History Survey        |
| 30.53 | -84.29  | 2016          |       | iNaturalist Research-grade Observation |
| 32.76 | -97.68  | 2016          |       | iNaturalist Research-grade Observation |
| 32.84 | -97.46  | 2016          |       | iNaturalist Research-grade Observation |
| 33.33 | -87.79  | 2016          |       | iNaturalist Research-grade Observation |
| 33.38 | -84.61  | 2014          |       | iNaturalist Research-grade Observation |
| 34.21 | -96.64  | 2016          |       | iNaturalist Research-grade Observation |
| 35.16 | -90.71  | 2016          |       | iNaturalist Research-grade Observation |
| 35.16 | -90.71  | 2016          |       | iNaturalist Research-grade Observation |
| 35.36 | -76.97  | 2016          |       | iNaturalist Research-grade Observation |
| 35.51 | -93.32  | 2015          |       | iNaturalist Research-grade Observation |
| 36.10 | -86.53  | 2016          |       | iNaturalist Research-grade Observation |
| 36.15 | -97.08  | 2012          |       | iNaturalist Research-grade Observation |
| 37.27 | -89.04  | 2016          |       | iNaturalist Research-grade Observation |
| 37.33 | -77.21  | 2014          |       | iNaturalist Research-grade Observation |
| 37.37 | -88.95  | 2016          |       | iNaturalist Research-grade Observation |
| 37.37 | -88.93  | 2016          |       | iNaturalist Research-grade Observation |
| 37.41 | -77.70  | 2013          |       | iNaturalist Research-grade Observation |
| 37.49 | -89.35  | 2016          |       | iNaturalist Research-grade Observation |
| 37.72 | -89.25  | 2016          |       | iNaturalist Research-grade Observation |
| 38.55 | -90.42  | 2016          |       | iNaturalist Research-grade Observation |
| 38.64 | -77.23  | 2014          |       | iNaturalist Research-grade Observation |
| 38.75 | -77.12  | 2012          |       | iNaturalist Research-grade Observation |
| 38.82 | -77.51  | 2016          |       | iNaturalist Research-grade Observation |
| 38.95 | -92.45  | 2016          |       | iNaturalist Research-grade Observation |
| 38.96 | -74.96  | 2016          |       | iNaturalist Research-grade Observation |
| 39.96 | -74.14  | 2016          |       | iNaturalist Research-grade Observation |
| 28.31 | -82.46  | 2011          |       | BISON                                  |
| 28.51 | -81.32  | 2009          |       | BISON                                  |
| 29.68 | -82.36  | 2006          |       | BISON                                  |
| 29.68 | -82.36  | 2006          |       | BISON                                  |
| 29.99 | -100.31 | 2009          |       | BISON                                  |
| 29.99 | -81.86  | 2014          |       | BISON                                  |
| 29.99 | -81.86  | 2014          |       | BISON                                  |
| 30.24 | -97.69  | 2005          | GBIF* | BISON                                  |
| 30.46 | -84.28  | 2017          |       | BISON                                  |
| 32.60 | -85.35  | 2008          |       | BISON                                  |
| 32.60 | -85.35  | 2008          |       | BISON                                  |
| 32.80 | -79.94  | 2012          |       | BISON                                  |
| 33.42 | -88.88  | 2016          |       | BISON                                  |
| 33.55 | -86.90  | 2013          |       | BISON                                  |

|       |        |      |       |
|-------|--------|------|-------|
| 33.70 | -84.77 | 2011 | BISON |
| 33.95 | -83.37 | 2016 | BISON |
| 34.72 | -96.69 | 2015 | BISON |
| 34.72 | -96.69 | 2013 | BISON |
| 34.72 | -96.69 | 2013 | BISON |
| 35.05 | -78.83 | 2006 | BISON |
| 35.05 | -78.83 | 2004 | BISON |
| 35.05 | -78.83 | 2004 | BISON |
| 35.05 | -78.83 | 2004 | BISON |
| 35.05 | -78.83 | 2005 | BISON |
| 35.21 | -97.32 | 2009 | BISON |
| 35.21 | -97.32 | 2009 | BISON |
| 35.79 | -78.65 | 2011 | BISON |
| 35.79 | -78.65 | 2011 | BISON |
| 35.79 | -78.65 | 2012 | BISON |
| 35.91 | -93.22 | 2009 | BISON |
| 35.97 | -77.99 | 2009 | BISON |
| 35.99 | -83.94 | 2015 | BISON |
| 36.08 | -79.79 | 2011 | BISON |
| 36.34 | -94.26 | 2015 | BISON |
| 36.62 | -96.41 | 2012 | BISON |
| 36.62 | -96.41 | 2008 | BISON |
| 36.62 | -96.41 | 2009 | BISON |
| 36.62 | -96.41 | 2011 | BISON |
| 36.62 | -96.41 | 2009 | BISON |
| 36.62 | -96.41 | 2008 | BISON |
| 36.62 | -96.41 | 2008 | BISON |
| 36.62 | -96.41 | 2012 | BISON |
| 36.62 | -96.41 | 2008 | BISON |
| 36.62 | -96.41 | 2008 | BISON |
| 36.62 | -96.41 | 2009 | BISON |
| 36.62 | -96.41 | 2009 | BISON |
| 36.62 | -96.41 | 2009 | BISON |
| 36.62 | -96.41 | 2008 | BISON |
| 36.62 | -96.41 | 2007 | BISON |
| 37.36 | -77.05 | 2014 | BISON |
| 37.62 | -84.87 | 2016 | BISON |
| 37.83 | -78.28 | 2011 | BISON |
| 37.97 | -85.70 | 2016 | BISON |
| 37.97 | -85.70 | 2016 | BISON |
| 38.22 | -75.31 | 2014 | BISON |
| 38.43 | -88.43 | 2007 | BISON |
| 38.68 | -75.34 | 2012 | BISON |
| 38.83 | -76.85 | 2017 | BISON |
| 38.88 | -94.82 | 2009 | BISON |
| 38.99 | -76.56 | 2015 | BISON |
| 38.99 | -76.56 | 2015 | BISON |
| 39.01 | -94.34 | 2015 | BISON |
| 39.16 | -86.52 | 2011 | BISON |
| 39.20 | -84.54 | 2013 | BISON |

|       |         |               |                                        |
|-------|---------|---------------|----------------------------------------|
| 39.58 | -75.64  | 2013          | BISON                                  |
| 39.80 | -74.96  | 2012          | BISON                                  |
| 39.80 | -74.96  | 2011          | BISON                                  |
| 39.80 | -74.96  | 2016          | BISON                                  |
| 39.80 | -74.96  | 2012          | BISON                                  |
| 39.88 | -74.66  | 2013          | BISON                                  |
| 39.88 | -74.66  | 2008          | BISON                                  |
| 39.88 | -74.66  | 2009          | BISON                                  |
| 39.97 | -75.75  | 2014          | BISON                                  |
| 40.75 | -87.83  | 2015          | BISON                                  |
| 40.94 | -72.69  | 2009          | BISON                                  |
| 40.94 | -72.69  | 2009          | BISON                                  |
| 40.94 | -72.69  | 2009          | BISON                                  |
| 40.94 | -72.69  | 2006          | BISON                                  |
| 41.40 | -71.62  | 2012          | BISON                                  |
| 42.48 | -71.40  | 2014          | BISON                                  |
| 43.43 | -70.67  | 2013          | BISON                                  |
| 44.65 | -71.29  | 2006          | BISON                                  |
| 38.09 | -88.95  | 1984          | Canadian Museum of Nature              |
| 34.68 | -98.40  | 2003          | Denver Museum of Nature & Science      |
| 38.03 | -78.50  | Not specified | Essig Museum of Entomology Research    |
| 27.45 | -80.33  | Not specified | Illinois Natural History Survey        |
| 28.02 | -81.73  | Not specified | Illinois Natural History Survey        |
| 28.87 | -81.27  | Not specified | Illinois Natural History Survey        |
| 31.14 | -99.33  | Not specified | Illinois Natural History Survey        |
| 34.50 | -106.00 | Not specified | Illinois Natural History Survey        |
| 34.50 | -93.06  | 1952          | Illinois Natural History Survey        |
| 36.26 | -90.97  | 1962          | Illinois Natural History Survey        |
| 36.32 | -91.48  | 1962          | Illinois Natural History Survey        |
| 36.33 | -94.12  | Not specified | Illinois Natural History Survey        |
| 36.33 | -94.12  | Not specified | Illinois Natural History Survey        |
| 37.25 | -90.53  | Not specified | Illinois Natural History Survey        |
| 37.38 | -88.66  | 1965          | Illinois Natural History Survey        |
| 37.69 | -88.92  | Not specified | Illinois Natural History Survey        |
| 37.76 | -89.08  | 1966          | Illinois Natural History Survey        |
| 37.82 | -90.24  | 1958          | Illinois Natural History Survey        |
| 38.43 | -89.48  | 1988          | Illinois Natural History Survey        |
| 39.58 | -88.65  | 1999          | Illinois Natural History Survey        |
| 40.11 | -88.21  | 1957          | Illinois Natural History Survey        |
| 40.11 | -88.21  | 1957          | Illinois Natural History Survey        |
| 42.28 | -88.44  | 1956          | Illinois Natural History Survey        |
| 46.25 | -114.16 | Not specified | Illinois Natural History Survey        |
| 27.62 | -97.22  | 2018          | iNaturalist Research-grade Observation |
| 28.57 | -81.00  | 2018          | iNaturalist Research-grade Observation |
| 29.62 | -98.68  | 2018          | iNaturalist Research-grade Observation |
| 29.63 | -82.37  | 2018          | iNaturalist Research-grade Observation |
| 29.72 | -82.22  | 2018          | iNaturalist Research-grade Observation |
| 29.83 | -81.98  | 2017          | iNaturalist Research-grade Observation |
| 29.94 | -81.98  | 2018          | iNaturalist Research-grade Observation |
| 30.20 | -83.93  | 2017          | iNaturalist Research-grade Observation |

|       |        |      |                                        |
|-------|--------|------|----------------------------------------|
| 30.27 | -95.68 | 2017 | iNaturalist Research-grade Observation |
| 30.44 | -84.18 | 2018 | iNaturalist Research-grade Observation |
| 30.53 | -84.29 | 2016 | iNaturalist Research-grade Observation |
| 30.72 | -94.23 | 2016 | iNaturalist Research-grade Observation |
| 30.93 | -84.15 | 2017 | iNaturalist Research-grade Observation |
| 31.59 | -95.37 | 2017 | iNaturalist Research-grade Observation |
| 32.55 | -85.03 | 2018 | iNaturalist Research-grade Observation |
| 32.55 | -85.03 | 2018 | iNaturalist Research-grade Observation |
| 32.68 | -80.35 | 2017 | iNaturalist Research-grade Observation |
| 32.68 | -80.35 | 2017 | iNaturalist Research-grade Observation |
| 32.72 | -97.12 | 2017 | iNaturalist Research-grade Observation |
| 32.76 | -97.68 | 2016 | iNaturalist Research-grade Observation |
| 32.76 | -97.68 | 2015 | iNaturalist Research-grade Observation |
| 32.79 | -97.41 | 2018 | iNaturalist Research-grade Observation |
| 32.84 | -97.46 | 2016 | iNaturalist Research-grade Observation |
| 32.86 | -97.48 | 2018 | iNaturalist Research-grade Observation |
| 32.94 | -97.48 | 2013 | iNaturalist Research-grade Observation |
| 33.19 | -87.48 | 2018 | iNaturalist Research-grade Observation |
| 33.24 | -87.56 | 2017 | iNaturalist Research-grade Observation |
| 33.35 | -93.18 | 2018 | iNaturalist Research-grade Observation |
| 33.38 | -84.61 | 2014 | iNaturalist Research-grade Observation |
| 33.78 | -83.37 | 2017 | iNaturalist Research-grade Observation |
| 33.79 | -95.63 | 2017 | iNaturalist Research-grade Observation |
| 33.79 | -95.67 | 2017 | iNaturalist Research-grade Observation |
| 33.81 | -95.68 | 2017 | iNaturalist Research-grade Observation |
| 34.21 | -96.64 | 2016 | iNaturalist Research-grade Observation |
| 34.31 | -94.63 | 2018 | iNaturalist Research-grade Observation |
| 34.38 | -85.63 | 2017 | iNaturalist Research-grade Observation |
| 34.38 | -85.63 | 2017 | iNaturalist Research-grade Observation |
| 34.76 | -92.31 | 2018 | iNaturalist Research-grade Observation |
| 34.98 | -85.81 | 2018 | iNaturalist Research-grade Observation |
| 35.00 | -85.37 | 2018 | iNaturalist Research-grade Observation |
| 35.01 | -85.36 | 2018 | iNaturalist Research-grade Observation |
| 35.08 | -85.59 | 2017 | iNaturalist Research-grade Observation |
| 35.16 | -85.12 | 2018 | iNaturalist Research-grade Observation |
| 35.16 | -90.71 | 2016 | iNaturalist Research-grade Observation |
| 35.16 | -90.71 | 2016 | iNaturalist Research-grade Observation |
| 35.17 | -85.12 | 2015 | iNaturalist Research-grade Observation |
| 35.21 | -97.25 | 2017 | iNaturalist Research-grade Observation |
| 35.21 | -97.23 | 2017 | iNaturalist Research-grade Observation |
| 35.22 | -97.21 | 2018 | iNaturalist Research-grade Observation |
| 35.27 | -75.53 | 2017 | iNaturalist Research-grade Observation |
| 35.35 | -82.78 | 2018 | iNaturalist Research-grade Observation |
| 35.36 | -76.97 | 2016 | iNaturalist Research-grade Observation |
| 35.53 | -78.80 | 2018 | iNaturalist Research-grade Observation |
| 35.62 | -78.93 | 2017 | iNaturalist Research-grade Observation |
| 35.69 | -94.84 | 2018 | iNaturalist Research-grade Observation |
| 35.71 | -77.95 | 2017 | iNaturalist Research-grade Observation |
| 35.75 | -78.72 | 2017 | iNaturalist Research-grade Observation |
| 35.81 | -78.48 | 2018 | iNaturalist Research-grade Observation |

|       |        |      |                                        |
|-------|--------|------|----------------------------------------|
| 35.88 | -84.30 | 2016 | iNaturalist Research-grade Observation |
| 35.88 | -84.30 | 2016 | iNaturalist Research-grade Observation |
| 35.89 | -78.96 | 2016 | iNaturalist Research-grade Observation |
| 35.92 | -78.39 | 2018 | iNaturalist Research-grade Observation |
| 35.93 | -78.77 | 2018 | iNaturalist Research-grade Observation |
| 35.97 | -78.97 | 2018 | iNaturalist Research-grade Observation |
| 35.97 | -78.97 | 2017 | iNaturalist Research-grade Observation |
| 35.97 | -78.96 | 2018 | iNaturalist Research-grade Observation |
| 35.97 | -78.96 | 2018 | iNaturalist Research-grade Observation |
| 35.97 | -78.96 | 2018 | iNaturalist Research-grade Observation |
| 36.00 | -78.93 | 2017 | iNaturalist Research-grade Observation |
| 36.07 | -94.21 | 2018 | iNaturalist Research-grade Observation |
| 36.10 | -86.53 | 2016 | iNaturalist Research-grade Observation |
| 36.15 | -97.08 | 2012 | iNaturalist Research-grade Observation |
| 36.22 | -95.91 | 2017 | iNaturalist Research-grade Observation |
| 36.29 | -95.65 | 2018 | iNaturalist Research-grade Observation |
| 36.30 | -80.06 | 2018 | iNaturalist Research-grade Observation |
| 36.55 | -93.78 | 2017 | iNaturalist Research-grade Observation |
| 36.65 | -91.78 | 2018 | iNaturalist Research-grade Observation |
| 36.70 | -78.67 | 2018 | iNaturalist Research-grade Observation |
| 36.85 | -89.89 | 2017 | iNaturalist Research-grade Observation |
| 36.90 | -87.63 | 2018 | iNaturalist Research-grade Observation |
| 36.97 | -94.36 | 2016 | iNaturalist Research-grade Observation |
| 37.03 | -91.17 | 2018 | iNaturalist Research-grade Observation |
| 37.04 | -78.46 | 2018 | iNaturalist Research-grade Observation |
| 37.04 | -78.28 | 2018 | iNaturalist Research-grade Observation |
| 37.06 | -76.31 | 2018 | iNaturalist Research-grade Observation |
| 37.07 | -76.31 | 2018 | iNaturalist Research-grade Observation |
| 37.17 | -91.04 | 2017 | iNaturalist Research-grade Observation |
| 37.19 | -90.99 | 2017 | iNaturalist Research-grade Observation |
| 37.20 | -78.45 | 2018 | iNaturalist Research-grade Observation |
| 37.33 | -77.21 | 2014 | iNaturalist Research-grade Observation |
| 37.37 | -88.93 | 2016 | iNaturalist Research-grade Observation |
| 37.38 | -79.14 | 2017 | iNaturalist Research-grade Observation |
| 37.39 | -86.23 | 2018 | iNaturalist Research-grade Observation |
| 37.41 | -76.94 | 2018 | iNaturalist Research-grade Observation |
| 37.41 | -76.71 | 2018 | iNaturalist Research-grade Observation |
| 37.41 | -77.70 | 2013 | iNaturalist Research-grade Observation |
| 37.45 | -77.64 | 2017 | iNaturalist Research-grade Observation |
| 37.45 | -77.64 | 2017 | iNaturalist Research-grade Observation |
| 37.49 | -89.35 | 2016 | iNaturalist Research-grade Observation |
| 37.54 | -84.90 | 2016 | iNaturalist Research-grade Observation |
| 37.56 | -77.47 | 2014 | iNaturalist Research-grade Observation |
| 37.56 | -93.41 | 2015 | iNaturalist Research-grade Observation |
| 37.59 | -88.38 | 2017 | iNaturalist Research-grade Observation |
| 37.65 | -97.45 | 2018 | iNaturalist Research-grade Observation |
| 37.72 | -89.20 | 2016 | iNaturalist Research-grade Observation |
| 37.72 | -89.25 | 2016 | iNaturalist Research-grade Observation |
| 37.74 | -97.26 | 2017 | iNaturalist Research-grade Observation |
| 38.01 | -77.92 | 2018 | iNaturalist Research-grade Observation |

|       |        |      |                                        |
|-------|--------|------|----------------------------------------|
| 38.02 | -77.92 | 2017 | iNaturalist Research-grade Observation |
| 38.17 | -86.32 | 2017 | iNaturalist Research-grade Observation |
| 38.21 | -75.80 | 2016 | iNaturalist Research-grade Observation |
| 38.21 | -75.80 | 2016 | iNaturalist Research-grade Observation |
| 38.55 | -90.42 | 2016 | iNaturalist Research-grade Observation |
| 38.58 | -82.79 | 2017 | iNaturalist Research-grade Observation |
| 38.59 | -92.23 | 2017 | iNaturalist Research-grade Observation |
| 38.59 | -92.23 | 2018 | iNaturalist Research-grade Observation |
| 38.59 | -92.23 | 2018 | iNaturalist Research-grade Observation |
| 38.62 | -77.53 | 2018 | iNaturalist Research-grade Observation |
| 38.63 | -77.54 | 2017 | iNaturalist Research-grade Observation |
| 38.64 | -77.23 | 2018 | iNaturalist Research-grade Observation |
| 38.64 | -77.23 | 2014 | iNaturalist Research-grade Observation |
| 38.68 | -77.25 | 2013 | iNaturalist Research-grade Observation |
| 38.75 | -77.12 | 2012 | iNaturalist Research-grade Observation |
| 38.76 | -75.73 | 2017 | iNaturalist Research-grade Observation |
| 38.77 | -75.09 | 2014 | iNaturalist Research-grade Observation |
| 38.79 | -76.70 | 2018 | iNaturalist Research-grade Observation |
| 38.79 | -93.22 | 2018 | iNaturalist Research-grade Observation |
| 38.81 | -77.52 | 2014 | iNaturalist Research-grade Observation |
| 38.95 | -92.45 | 2018 | iNaturalist Research-grade Observation |
| 38.95 | -92.45 | 2018 | iNaturalist Research-grade Observation |
| 38.95 | -92.45 | 2017 | iNaturalist Research-grade Observation |
| 38.95 | -92.45 | 2018 | iNaturalist Research-grade Observation |
| 38.95 | -92.45 | 2017 | iNaturalist Research-grade Observation |
| 38.95 | -92.45 | 2017 | iNaturalist Research-grade Observation |
| 38.95 | -92.45 | 2017 | iNaturalist Research-grade Observation |
| 38.95 | -92.45 | 2017 | iNaturalist Research-grade Observation |
| 38.95 | -92.45 | 2016 | iNaturalist Research-grade Observation |
| 38.96 | -77.33 | 2015 | iNaturalist Research-grade Observation |
| 38.96 | -74.96 | 2016 | iNaturalist Research-grade Observation |
| 38.97 | -90.51 | 2017 | iNaturalist Research-grade Observation |
| 38.98 | -77.24 | 2013 | iNaturalist Research-grade Observation |
| 38.98 | -77.24 | 2013 | iNaturalist Research-grade Observation |
| 39.00 | -76.82 | 2018 | iNaturalist Research-grade Observation |
| 39.06 | -76.79 | 2016 | iNaturalist Research-grade Observation |
| 39.13 | -77.15 | 2018 | iNaturalist Research-grade Observation |
| 39.18 | -82.40 | 2017 | iNaturalist Research-grade Observation |
| 39.19 | -96.55 | 2018 | iNaturalist Research-grade Observation |
| 39.20 | -96.68 | 2018 | iNaturalist Research-grade Observation |
| 39.22 | -76.80 | 2018 | iNaturalist Research-grade Observation |
| 39.24 | -76.60 | 2016 | iNaturalist Research-grade Observation |
| 39.32 | -76.51 | 2018 | iNaturalist Research-grade Observation |
| 39.41 | -94.26 | 2018 | iNaturalist Research-grade Observation |
| 39.51 | -75.15 | 2018 | iNaturalist Research-grade Observation |
| 39.77 | -74.37 | 2016 | iNaturalist Research-grade Observation |
| 39.96 | -74.14 | 2016 | iNaturalist Research-grade Observation |
| 40.00 | -74.82 | 2018 | iNaturalist Research-grade Observation |
| 40.27 | -74.65 | 2018 | iNaturalist Research-grade Observation |
| 40.47 | -79.95 | 2018 | iNaturalist Research-grade Observation |



|       |         |               |            |                                               |
|-------|---------|---------------|------------|-----------------------------------------------|
| 40.47 | -74.42  | 2018          |            | iNaturalist Research-grade Observation        |
| 40.47 | -74.42  | 2017          |            | iNaturalist Research-grade Observation        |
| 40.54 | -74.23  | 2017          |            | iNaturalist Research-grade Observation        |
| 40.54 | -74.23  | 2017          |            | iNaturalist Research-grade Observation        |
| 40.90 | -72.81  | 2018          |            | iNaturalist Research-grade Observation        |
| 40.90 | -72.81  | 2018          |            | iNaturalist Research-grade Observation        |
| 40.99 | -87.57  | 2015          |            | iNaturalist Research-grade Observation        |
| 41.29 | -96.10  | 2018          |            | iNaturalist Research-grade Observation        |
| 41.98 | -87.74  | 2015          |            | iNaturalist Research-grade Observation        |
| 42.17 | -80.07  | 2018          |            | iNaturalist Research-grade Observation        |
| 42.24 | -87.82  | 2018          |            | iNaturalist Research-grade Observation        |
| 43.42 | -91.01  | 2018          |            | iNaturalist Research-grade Observation        |
| 30.32 | -98.95  | Not specified |            | Ohio State University Acarology Laboratory    |
| 33.70 | -84.35  | Not specified |            | Ohio State University Acarology Laboratory    |
| 33.70 | -84.35  | Not specified |            | Ohio State University Acarology Laboratory    |
| 33.70 | -84.35  | Not specified |            | Ohio State University Acarology Laboratory    |
| 34.23 | -91.90  | 1954          |            | Ohio State University Acarology Laboratory    |
| 34.23 | -91.90  | 1954          |            | Ohio State University Acarology Laboratory    |
| 34.23 | -91.90  | 1954          |            | Ohio State University Acarology Laboratory    |
| 34.23 | -91.90  | 1954          |            | Ohio State University Acarology Laboratory    |
| 34.23 | -91.90  | 1954          |            | Ohio State University Acarology Laboratory    |
| 35.97 | -94.23  | 1955          |            | Ohio State University Acarology Laboratory    |
| 39.05 | -76.80  | 1955          |            | Ohio State University Acarology Laboratory    |
| 40.94 | -74.40  | Not specified |            | Ohio State University Acarology Laboratory    |
| 42.41 | -83.93  | 1951          |            | Ohio State University Acarology Laboratory    |
| 42.41 | -83.93  | 1951          |            | Ohio State University Acarology Laboratory    |
| 42.41 | -83.93  | 1951          |            | Ohio State University Acarology Laboratory    |
| 42.41 | -83.93  | 1951          |            | Ohio State University Acarology Laboratory    |
| 42.41 | -83.93  | 1951          |            | Ohio State University Acarology Laboratory    |
| 42.41 | -83.93  | 1951          |            | Ohio State University Acarology Laboratory    |
| 42.41 | -83.93  | 1951          |            | Ohio State University Acarology Laboratory    |
| 42.41 | -83.93  | 1951          |            | Ohio State University Acarology Laboratory    |
| 42.41 | -83.93  | 1951          |            | Ohio State University Acarology Laboratory    |
| 42.41 | -83.93  | 1951          |            | Ohio State University Acarology Laboratory    |
| 42.41 | -83.93  | 1951          |            | Ohio State University Acarology Laboratory    |
| 46.25 | -114.17 | 1966          |            | South African National Biodiversity Institute |
| 36.69 | -92.42  | 2015          |            |                                               |
| 36.75 | -91.32  | 2015          |            |                                               |
| 36.83 | -92.10  | 2015          |            |                                               |
| 36.87 | -92.47  | 2015          |            | [1]                                           |
| 37.19 | -91.45  | 2015          |            |                                               |
| 37.41 | -92.33  | 2015          |            |                                               |
| 37.04 | -91.19  | 2006          |            |                                               |
| 37.08 | -91.06  | 2006          | Literature | [2]                                           |
| 36.94 | -90.35  | 2001          |            | [3]                                           |
| 35.61 | -79.16  | 2009          |            | [4]                                           |
| 35.75 | -79.06  | 2009          |            |                                               |
| 40.18 | -92.60  | 2007-2010     |            | [5]                                           |
| 39.06 | -76.82  | 2006          |            | [6]                                           |
| 39.08 | -76.44  | 1998-2007     |            | [7]                                           |
| 31.61 | -91.23  | 2008          |            | [8]                                           |

|       |        |           |      |
|-------|--------|-----------|------|
| 33.27 | -88.78 | 2008      |      |
| 33.45 | -88.59 | 2008      |      |
| 34.23 | -88.63 | 2008      |      |
| 34.60 | -88.19 | 2008      |      |
| 34.66 | -89.46 | 2008      |      |
| 35.13 | -79.20 | 2011      | [9]  |
| 30.12 | -85.72 | 1994-1996 | [10] |
| 39.11 | -96.61 | 1995-1996 | [11] |
| 33.35 | -83.15 | 1987-1991 | [12] |
| 32.00 | -85.46 | 1988-1990 |      |
| 32.91 | -86.35 | 1988-1990 |      |
| 32.96 | -87.46 | 1988-1990 | [13] |
| 33.75 | -85.62 | 1988-1990 |      |
| 39.26 | -75.47 | 2013      | [14] |
| 40.66 | -73.08 | 1986-1987 | [15] |
| 31.84 | -90.70 | 1999-2000 |      |
| 34.67 | -89.46 | 1999-2000 | [16] |
| 39.83 | -77.25 | 2009      | [17] |
| 36.13 | -97.22 | 2008      | [18] |
| 38.85 | -77.40 | 2011      |      |
| 38.85 | -77.40 | 2011      | [19] |
| 38.85 | -77.40 | 2011      |      |
| 40.05 | -92.84 | 2014      |      |
| 40.05 | -92.84 | 2014      |      |
| 40.05 | -92.84 | 2014      |      |
| 40.05 | -92.84 | 2014      |      |
| 40.12 | -92.64 | 2014      |      |
| 40.12 | -92.64 | 2014      |      |
| 40.12 | -92.64 | 2014      |      |
| 40.12 | -92.64 | 2014      |      |
| 40.12 | -92.64 | 2014      | [20] |
| 40.16 | -92.62 | 2014      |      |
| 40.16 | -92.62 | 2014      |      |
| 40.16 | -92.62 | 2014      |      |
| 40.16 | -92.62 | 2014      |      |
| 40.29 | -92.80 | 2014      |      |
| 40.29 | -92.80 | 2014      |      |
| 40.29 | -92.80 | 2014      |      |
| 40.29 | -92.80 | 2014      |      |
| 29.95 | -81.95 | 2011      | [21] |
| 41.61 | -71.32 | 1992      | [22] |
| 33.26 | -88.84 | 1992-1993 | [23] |
| 38.07 | -77.32 | 2005      | [24] |
| 38.52 | -90.54 | 2009      | [25] |
| 31.84 | -81.10 | 2005-2009 |      |
| 31.84 | -81.10 | 2005-2009 |      |
| 33.05 | -83.77 | 2005-2009 |      |
| 33.05 | -83.77 | 2005-2009 | [26] |
| 33.46 | -83.73 | 2005-2009 |      |
| 33.46 | -83.73 | 2005-2009 |      |
| 33.63 | -84.15 | 2005-2009 |      |



|       |        |               |      |
|-------|--------|---------------|------|
| 40.94 | -72.93 | Not specified |      |
| 40.94 | -72.93 | Not specified |      |
| 40.94 | -72.93 | Not specified |      |
| 40.94 | -72.93 | Not specified |      |
| 40.94 | -72.93 | Not specified |      |
| 40.94 | -72.93 | Not specified |      |
| 40.94 | -72.93 | Not specified |      |
| 40.94 | -72.93 | Not specified |      |
| 40.94 | -72.93 | Not specified |      |
| 40.94 | -72.93 | Not specified |      |
| 40.94 | -72.93 | Not specified |      |
| 40.94 | -72.93 | Not specified |      |
| 40.94 | -72.93 | Not specified |      |
| 40.94 | -72.93 | Not specified |      |
| 40.94 | -72.93 | Not specified |      |
| 40.94 | -72.93 | Not specified |      |
| 40.96 | -72.80 | Not specified |      |
| 40.96 | -72.80 | Not specified |      |
| 35.24 | -97.32 | 2015          |      |
| 35.24 | -97.32 | 2015          |      |
| 35.42 | -99.06 | 2015          |      |
| 35.93 | -98.43 | 2015          |      |
| 36.06 | -97.40 | 2015          | [35] |
| 36.06 | -97.40 | 2015          |      |
| 36.06 | -97.40 | 2015          |      |
| 36.13 | -97.07 | 2015          |      |
| 36.16 | -97.20 | 2015          |      |
| 35.48 | -97.46 | 2015          |      |
| 35.48 | -97.46 | 2015          |      |
| 35.49 | -97.51 | 2015          |      |
| 35.49 | -97.51 | 2015          |      |
| 35.51 | -97.52 | 2015          |      |
| 35.51 | -97.52 | 2015          |      |
| 35.52 | -97.55 | 2015          |      |
| 35.52 | -97.55 | 2015          |      |
| 35.53 | -97.61 | 2015          |      |
| 35.53 | -97.61 | 2015          |      |
| 35.55 | -97.57 | 2015          | [36] |
| 35.55 | -97.57 | 2015          |      |
| 35.55 | -97.58 | 2015          |      |
| 35.55 | -97.58 | 2015          |      |
| 35.56 | -97.61 | 2015          |      |
| 35.56 | -97.61 | 2015          |      |
| 35.59 | -97.61 | 2015          |      |
| 35.59 | -97.61 | 2015          |      |
| 35.61 | -97.61 | 2015          |      |
| 35.61 | -97.61 | 2015          |      |
| 38.71 | -77.24 | 2010-2011     | [37] |
| 38.85 | -77.48 | 2010-2011     |      |
| 34.59 | -77.33 | 1990-1993     | [38] |
| 40.18 | -92.60 | 2007          | [39] |

|       |        |                         |      |
|-------|--------|-------------------------|------|
| 36.06 | -97.23 | 2006-2007,<br>2009-2010 | [40] |
| 35.11 | -89.21 | 2013                    |      |
| 35.11 | -89.21 | 2013                    |      |
| 35.41 | -86.81 | 2013                    |      |
| 35.41 | -86.81 | 2013                    |      |
| 35.72 | -86.95 | 2013                    |      |
| 35.72 | -86.95 | 2013                    |      |
| 35.82 | -83.82 | 2013                    |      |
| 35.82 | -83.82 | 2013                    | [41] |
| 35.84 | -85.06 | 2013                    |      |
| 35.84 | -85.06 | 2013                    |      |
| 36.11 | -82.84 | 2013                    |      |
| 36.11 | -82.84 | 2013                    |      |
| 36.47 | -86.84 | 2013                    |      |
| 36.47 | -86.84 | 2013                    |      |
| 35.72 | -79.45 | Not specified           | [42] |
| 29.60 | -99.74 | 1990-1992               |      |
| 30.62 | -95.52 | 1990-1992               |      |
| 31.04 | -98.48 | 1990-1992               |      |
| 31.86 | -99.03 | 1990-1992               |      |
| 31.91 | -95.90 | 1990-1992               | [43] |
| 32.26 | -97.55 | 1990-1992               |      |
| 32.48 | -95.30 | 1990-1992               |      |
| 32.86 | -98.48 | 1990-1992               |      |
| 31.15 | -97.82 | 2008-2011               |      |
| 31.15 | -97.82 | 2008-2011               |      |
| 31.15 | -97.82 | 2008-2011               |      |
| 31.15 | -97.82 | 2008-2011               |      |
| 31.15 | -97.82 | 2008-2011               | [44] |
| 31.15 | -97.82 | 2008-2011               |      |
| 31.15 | -97.82 | 2008-2011               |      |
| 31.15 | -97.82 | 2008-2011               |      |
| 31.15 | -97.82 | 2008-2011               |      |
| 38.07 | -77.33 | 1987                    | [45] |
| 39.86 | -94.79 | 2013                    |      |
| 39.86 | -94.79 | 2013                    |      |
| 39.86 | -94.79 | 2013                    |      |
| 39.92 | -94.89 | 2013                    |      |
| 39.92 | -94.89 | 2013                    |      |
| 39.92 | -94.89 | 2013                    |      |
| 39.96 | -94.97 | 2013                    |      |
| 39.96 | -94.97 | 2013                    | [46] |
| 39.96 | -94.97 | 2013                    |      |
| 39.96 | -94.98 | 2013                    |      |
| 39.96 | -94.98 | 2013                    |      |
| 39.96 | -94.98 | 2013                    |      |
| 40.16 | -94.54 | 2013                    |      |
| 40.16 | -94.54 | 2013                    |      |

|       |        |           |      |
|-------|--------|-----------|------|
| 40.16 | -94.54 | 2013      |      |
| 40.57 | -94.67 | 2013      |      |
| 40.57 | -94.67 | 2013      |      |
| 40.57 | -94.67 | 2013      |      |
| 29.48 | -82.98 | 2010-2011 |      |
| 29.48 | -82.98 | 2010-2011 |      |
| 29.50 | -82.97 | 2010-2011 |      |
| 29.59 | -82.93 | 2010-2011 |      |
| 29.71 | -82.46 | 2010-2011 |      |
| 29.71 | -82.46 | 2010-2011 |      |
| 29.71 | -82.46 | 2010-2011 | [47] |
| 29.71 | -82.46 | 2010-2011 |      |
| 29.91 | -82.57 | 2010-2011 |      |
| 29.91 | -82.57 | 2010-2011 |      |
| 29.91 | -82.57 | 2010-2011 |      |
| 29.92 | -82.59 | 2010-2011 |      |
| 29.96 | -82.78 | 2010-2011 |      |
| 30.46 | -81.42 | 2010-2011 |      |
| 29.48 | -82.97 | 2010-2012 |      |
| 29.48 | -82.97 | 2010-2012 |      |
| 29.59 | -82.94 | 2010-2012 |      |
| 29.74 | -82.43 | 2010-2012 |      |
| 29.74 | -82.43 | 2010-2012 | [48] |
| 29.74 | -82.43 | 2010-2012 |      |
| 29.92 | -82.57 | 2010-2012 |      |
| 29.92 | -82.57 | 2010-2012 |      |
| 29.92 | -82.57 | 2010-2012 |      |
| 40.26 | -74.11 | 2003-2004 |      |
| 40.26 | -74.11 | 2003-2004 | [49] |
| 40.16 | -74.13 | 2004      |      |
| 40.16 | -74.13 | 2004      |      |
| 40.17 | -74.18 | 2004      |      |
| 40.17 | -74.18 | 2004      |      |
| 40.17 | -74.21 | 2004      |      |
| 40.17 | -74.21 | 2004      |      |
| 40.21 | -74.09 | 2004      |      |
| 40.21 | -74.09 | 2004      |      |
| 40.26 | -74.25 | 2004      | [50] |
| 40.26 | -74.25 | 2004      |      |
| 40.27 | -74.16 | 2004      |      |
| 40.27 | -74.32 | 2004      |      |
| 40.27 | -74.32 | 2004      |      |
| 40.28 | -74.09 | 2004      |      |
| 40.28 | -74.09 | 2004      |      |
| 40.30 | -74.14 | 2004      |      |
| 40.30 | -74.14 | 2004      |      |
| 40.15 | -74.09 | 2008      |      |
| 40.16 | -74.51 | 2008      |      |
| 40.17 | -74.19 | 2008      | [51] |
| 40.21 | -74.05 | 2008      |      |



|       |        |               |      |
|-------|--------|---------------|------|
| 35.12 | -89.22 | 2012          |      |
| 35.12 | -89.22 | 2012          |      |
| 35.12 | -89.22 | 2012          |      |
| 35.12 | -89.22 | 2012          |      |
| 35.12 | -89.22 | 2012          |      |
| 35.12 | -89.22 | 2012          |      |
| 35.12 | -89.22 | 2012          |      |
| 35.12 | -89.22 | 2012          |      |
| 35.12 | -89.22 | 2012          |      |
| 35.12 | -89.22 | 2012          |      |
| 35.12 | -89.22 | 2012          |      |
| 35.12 | -89.22 | 2012          |      |
| 35.12 | -89.22 | 2012          |      |
| 35.12 | -89.22 | 2012          |      |
| 35.12 | -89.22 | 2012          |      |
| 35.12 | -89.22 | 2012          |      |
| 35.12 | -89.22 | 2012          |      |
| 35.12 | -89.22 | 2012          |      |
| 35.12 | -89.22 | 2012          |      |
| 35.12 | -89.22 | 2012          |      |
| 35.12 | -89.22 | 2012          |      |
| 35.12 | -89.22 | 2012          |      |
| 35.12 | -89.22 | 2012          |      |
| 35.12 | -89.22 | 2012          |      |
| 35.12 | -89.22 | 2012          |      |
| 31.47 | -81.24 | Not specified | [60] |
| 33.64 | -84.17 | 2010-2011     |      |
| 33.75 | -84.63 | 2010-2011     |      |
| 35.26 | -75.56 | 2010-2011     | [61] |
| 41.06 | -72.31 | 2010-2011     |      |
| 33.71 | -85.78 | 2008-2009     |      |
| 33.72 | -85.78 | 2008-2009     |      |
| 33.72 | -85.79 | 2008-2009     |      |
| 33.79 | -85.58 | 2008-2009     |      |
| 33.79 | -85.59 | 2008-2009     |      |
| 33.79 | -85.59 | 2008-2009     |      |
| 33.79 | -85.56 | 2008-2009     |      |
| 33.79 | -85.57 | 2008-2009     |      |
| 33.79 | -85.57 | 2008-2009     |      |
| 33.79 | -85.59 | 2008-2009     |      |
| 33.79 | -85.55 | 2008-2009     | [62] |
| 33.79 | -85.56 | 2008-2009     |      |
| 33.79 | -85.55 | 2008-2009     |      |
| 33.79 | -85.55 | 2008-2009     |      |
| 33.79 | -85.55 | 2008-2009     |      |
| 33.79 | -85.55 | 2008-2009     |      |
| 33.82 | -85.76 | 2008-2009     |      |
| 33.83 | -85.76 | 2008-2009     |      |
| 34.00 | -85.45 | 2008-2009     |      |
| 34.00 | -85.45 | 2008-2009     |      |
| 34.01 | -85.46 | 2008-2009     |      |
| 38.25 | -75.16 | 2008-2009     |      |
| 38.25 | -75.16 | 2008-2009     | [63] |



|       |        |           |
|-------|--------|-----------|
| 38.25 | -75.16 | 2008-2009 |
| 38.25 | -75.16 | 2008-2009 |
| 38.27 | -75.45 | 2008-2009 |
| 38.27 | -75.45 | 2008-2009 |
| 38.29 | -76.52 | 2008-2009 |
| 38.29 | -76.52 | 2008-2009 |
| 38.35 | -75.42 | 2008-2009 |
| 38.35 | -75.42 | 2008-2009 |
| 38.36 | -76.53 | 2008-2009 |
| 38.36 | -76.53 | 2008-2009 |
| 38.41 | -76.44 | 2008-2009 |
| 38.41 | -76.44 | 2008-2009 |
| 38.41 | -76.44 | 2008-2009 |
| 38.47 | -77.02 | 2008-2009 |
| 38.49 | -75.79 | 2008-2009 |
| 38.49 | -75.79 | 2008-2009 |
| 38.54 | -75.93 | 2008-2009 |
| 38.54 | -75.93 | 2008-2009 |
| 38.54 | -75.93 | 2008-2009 |
| 38.54 | -75.93 | 2008-2009 |
| 38.61 | -77.13 | 2008-2009 |
| 38.61 | -77.13 | 2008-2009 |
| 38.65 | -76.81 | 2008-2009 |
| 38.65 | -76.81 | 2008-2009 |
| 38.65 | -76.81 | 2008-2009 |
| 38.65 | -76.81 | 2008-2009 |
| 38.75 | -75.73 | 2008-2009 |
| 38.75 | -75.73 | 2008-2009 |
| 38.75 | -75.73 | 2008-2009 |
| 38.75 | -75.73 | 2008-2009 |
| 38.96 | -75.94 | 2008-2009 |
| 39.03 | -76.41 | 2008-2009 |
| 39.03 | -76.41 | 2008-2009 |
| 39.04 | -77.25 | 2008-2009 |
| 39.04 | -77.25 | 2008-2009 |
| 39.04 | -77.25 | 2008-2009 |
| 39.04 | -77.25 | 2008-2009 |
| 39.28 | -75.77 | 2008-2009 |
| 39.28 | -75.77 | 2008-2009 |
| 39.31 | -77.16 | 2008-2009 |
| 39.49 | -75.98 | 2008-2009 |
| 39.61 | -76.68 | 2008-2009 |
| 37.66 | -89.27 | 2003-2015 |
| 37.67 | -89.32 | 2003-2015 |
| 37.67 | -89.21 | 2003-2015 |
| 37.67 | -89.39 | 2003-2015 |
| 37.71 | -89.25 | 2003-2015 |
| 37.71 | -89.20 | 2003-2015 |
| 37.72 | -89.39 | 2003-2015 |
| 37.73 | -89.32 | 2003-2015 |

|       |        |           |           |         |
|-------|--------|-----------|-----------|---------|
| 37.76 | -89.25 | 2003-2015 |           |         |
| 37.76 | -89.19 | 2003-2015 |           |         |
| 37.76 | -89.31 | 2003-2015 |           |         |
| 37.78 | -89.39 | 2003-2015 |           |         |
| 37.79 | -89.31 | 2003-2015 |           |         |
| 37.79 | -89.25 | 2003-2015 |           |         |
| 36.49 | -88.04 | 1984-1986 |           | [65]    |
| 29.49 | -82.97 | 1995-2010 |           |         |
| 29.52 | -82.29 | 1995-2010 |           |         |
| 29.92 | -82.58 | 1995-2010 |           |         |
| 30.14 | -85.74 | 1995-2010 |           |         |
| 30.85 | -81.46 | 1995-2010 |           |         |
| 31.05 | -81.41 | 1995-2010 |           |         |
| 31.59 | -91.21 | 1995-2010 |           |         |
| 31.70 | -81.28 | 1995-2010 |           |         |
| 31.84 | -90.70 | 1995-2010 |           |         |
| 32.37 | -80.46 | 1995-2010 |           |         |
| 33.13 | -83.75 | 1995-2010 |           |         |
| 33.25 | -88.77 | 1995-2010 |           |         |
| 33.40 | -83.49 | 1995-2010 |           |         |
| 33.45 | -88.59 | 1995-2010 |           |         |
| 33.63 | -84.17 | 1995-2010 |           |         |
| 33.65 | -88.45 | 1995-2010 |           |         |
| 33.66 | -83.61 | 1995-2010 |           |         |
| 33.95 | -83.37 | 1995-2010 |           |         |
| 34.14 | -78.59 | 1995-2010 |           |         |
| 34.24 | -88.62 | 1995-2010 |           |         |
| 34.29 | -82.86 | 1995-2010 |           |         |
| 34.44 | -89.35 | 1995-2010 | VectorMap | [66-68] |
| 34.61 | -88.19 | 1995-2010 |           |         |
| 34.66 | -89.47 | 1995-2010 |           |         |
| 34.68 | -77.35 | 1995-2010 |           |         |
| 35.26 | -75.54 | 1995-2010 |           |         |
| 35.35 | -80.09 | 1995-2010 |           |         |
| 35.48 | -79.18 | 1995-2010 |           |         |
| 35.90 | -75.67 | 1995-2010 |           |         |
| 36.12 | -96.12 | 1995-2010 |           |         |
| 37.05 | -77.95 | 1995-2010 |           |         |
| 37.06 | -91.05 | 1995-2010 |           |         |
| 37.23 | -93.00 | 1995-2010 |           |         |
| 38.13 | -75.44 | 1995-2010 |           |         |
| 38.23 | -75.14 | 1995-2010 |           |         |
| 38.27 | -76.50 | 1995-2010 |           |         |
| 38.37 | -76.53 | 1995-2010 |           |         |
| 38.40 | -76.42 | 1995-2010 |           |         |
| 38.43 | -77.25 | 1995-2010 |           |         |
| 38.44 | -86.53 | 1995-2010 |           |         |
| 38.47 | -77.01 | 1995-2010 |           |         |
| 38.52 | -90.55 | 1995-2010 |           |         |
| 38.54 | -75.93 | 1995-2010 |           |         |

|       |        |           |
|-------|--------|-----------|
| 38.62 | -77.12 | 1995-2010 |
| 38.64 | -76.78 | 1995-2010 |
| 38.72 | -75.75 | 1995-2010 |
| 38.97 | -75.94 | 1995-2010 |
| 39.02 | -76.40 | 1995-2010 |
| 39.03 | -76.89 | 1995-2010 |
| 39.07 | -95.24 | 1995-2010 |
| 39.28 | -75.77 | 1995-2010 |
| 39.42 | -76.54 | 1995-2010 |
| 39.48 | -75.98 | 1995-2010 |
| 40.18 | -92.60 | 1995-2010 |
| 40.22 | -74.44 | 1995-2010 |
| 40.29 | -74.17 | 1995-2010 |
| 40.65 | -73.15 | 1995-2010 |
| 40.87 | -72.81 | 1995-2010 |
| 41.04 | -71.95 | 1995-2010 |
| 41.07 | -72.34 | 1995-2010 |
| 41.60 | -71.30 | 1995-2010 |

\* *A. americanum*: GBIF.org (accessed 24th September 2018) GBIF Occurrence Download  
<https://doi.org/10.15468/dl.z8nzgs>

**Table S2.** Each geolocation recorded for ticks in the species *Amblyomma maculatum* in the literature and publicly available online databases.

| Latitude | Longitude | Year | Data Source | Reference |
|----------|-----------|------|-------------|-----------|
| 35.05    | -78.83    | 2005 |             | BugGuide  |
| 27.70    | -80.57    | 2006 |             | BugGuide  |
| 32.80    | -79.94    | 2007 |             | BugGuide  |
| 30.24    | -97.69    | 2013 |             | BugGuide  |
| 32.13    | -111.78   | 2015 |             | BugGuide  |
| 33.19    | -96.58    | 2017 |             | BugGuide  |
| 30.67    | -86.59    | 2007 |             | BugGuide  |
| 27.95    | -81.69    | 2007 |             | BugGuide  |
| 32.60    | -85.35    | 2008 |             | BugGuide  |
| 33.95    | -83.37    | 2008 |             | BugGuide  |
| 29.50    | -90.04    | 2009 |             | BugGuide  |
| 30.66    | -87.75    | 2009 |             | BugGuide  |
| 29.86    | -95.39    | 2010 | BISON       | BugGuide  |
| 29.86    | -95.39    | 2010 |             | BugGuide  |
| 26.10    | -97.48    | 2010 |             | BugGuide  |
| 31.53    | -84.21    | 2011 |             | BugGuide  |
| 34.03    | -96.77    | 2012 |             | BugGuide  |
| 30.66    | -87.75    | 2012 |             | BugGuide  |
| 32.77    | -96.78    | 2013 |             | BugGuide  |
| 40.24    | -89.91    | 2015 |             | BugGuide  |
| 40.14    | -88.20    | 2015 |             | BugGuide  |
| 33.55    | -81.63    | 2015 |             | BugGuide  |
| 33.55    | -81.63    | 2015 |             | BugGuide  |
| 35.21    | -97.32    | 2017 |             | BugGuide  |

|       |         |      |       |                                                   |
|-------|---------|------|-------|---------------------------------------------------|
| 31.53 | -110.85 | 2017 |       | BugGuide                                          |
| 31.53 | -110.85 | 2017 |       | BugGuide                                          |
| 32.40 | -89.12  | 2017 |       | BugGuide                                          |
| 40.72 | -89.60  | 1990 |       | Illinois Natural History Survey Insect Collection |
| 29.21 | -81.02  | 1945 |       | Illinois Natural History Survey Insect Collection |
| 30.42 | -97.76  | 2013 |       | iNaturalist Research-grade Observation            |
| 32.59 | -97.10  | 2014 |       | iNaturalist Research-grade Observation            |
| 32.59 | -97.10  | 2014 |       | iNaturalist Research-grade Observation            |
| 30.65 | -98.04  | 2010 |       | iNaturalist Research-grade Observation            |
| 27.84 | -97.07  | 2016 |       | iNaturalist Research-grade Observation            |
| 32.89 | -97.28  | 2016 |       | iNaturalist Research-grade Observation            |
| 25.96 | -97.25  | 2015 |       | iNaturalist Research-grade Observation            |
| 29.25 | -95.60  | 2016 |       | iNaturalist Research-grade Observation            |
| 29.92 | -95.22  | 2016 |       | iNaturalist Research-grade Observation            |
| 38.81 | -77.53  | 2016 |       | iNaturalist Research-grade Observation            |
| 33.55 | -81.63  | 2015 |       | BugGuide                                          |
| 32.77 | -96.78  | 2013 |       | BugGuide                                          |
| 30.67 | -86.59  | 2007 |       | BugGuide                                          |
| 29.50 | -90.04  | 2009 |       | BugGuide                                          |
| 31.53 | -84.21  | 2011 |       | BugGuide                                          |
| 35.21 | -97.32  | 2017 |       | BugGuide                                          |
| 31.53 | -110.85 | 2017 |       | BugGuide                                          |
| 30.66 | -87.75  | 2012 |       | BugGuide                                          |
| 32.40 | -89.12  | 2017 |       | BugGuide                                          |
| 33.55 | -81.63  | 2015 |       | BugGuide                                          |
| 31.53 | -110.85 | 2017 |       | BugGuide                                          |
| 30.66 | -87.75  | 2009 |       | BugGuide                                          |
| 26.10 | -97.48  | 2010 |       | BugGuide                                          |
| 33.95 | -83.37  | 2008 |       | BugGuide                                          |
| 34.03 | -96.77  | 2012 |       | BugGuide                                          |
| 40.14 | -88.20  | 2015 |       | BugGuide                                          |
| 40.24 | -89.91  | 2015 |       | BugGuide                                          |
| 27.95 | -81.69  | 2007 | GBIF* | BugGuide                                          |
| 32.60 | -85.35  | 2008 |       | BugGuide                                          |
| 29.86 | -95.39  | 2010 |       | BugGuide                                          |
| 29.86 | -95.39  | 2010 |       | BugGuide                                          |
| 33.19 | -96.58  | 2017 |       | BugGuide                                          |
| 35.05 | -78.83  | 2005 |       | BugGuide                                          |
| 30.24 | -97.69  | 2013 |       | BugGuide                                          |
| 27.70 | -80.57  | 2006 |       | BugGuide                                          |
| 32.80 | -79.94  | 2007 |       | BugGuide                                          |
| 32.13 | -111.78 | 2015 |       | BugGuide                                          |
| 34.69 | -98.45  | 2004 |       | DMNS                                              |
| 34.70 | -98.57  | 2003 |       | DMNS                                              |
| 34.64 | -98.32  | 2004 |       | DMNS                                              |
| 34.66 | -98.28  | 2004 |       | DMNS                                              |
| 29.21 | -81.02  | 1945 |       | Illinois Natural History Survey                   |
| 40.72 | -89.60  | 1990 |       | Illinois Natural History Survey                   |
| 29.94 | -95.65  | 2018 |       | iNaturalist Research-grade Observation            |
| 29.20 | -94.96  | 2018 |       | iNaturalist Research-grade Observation            |

|       |         |      |                                        |
|-------|---------|------|----------------------------------------|
| 30.52 | -84.35  | 2018 | iNaturalist Research-grade Observation |
| 29.20 | -94.96  | 2018 | iNaturalist Research-grade Observation |
| 32.88 | -97.28  | 2018 | iNaturalist Research-grade Observation |
| 28.66 | -97.39  | 2018 | iNaturalist Research-grade Observation |
| 30.61 | -88.17  | 2018 | iNaturalist Research-grade Observation |
| 28.65 | -97.39  | 2018 | iNaturalist Research-grade Observation |
| 32.77 | -97.37  | 2018 | iNaturalist Research-grade Observation |
| 32.97 | -93.43  | 2018 | iNaturalist Research-grade Observation |
| 40.40 | -89.88  | 2015 | iNaturalist Research-grade Observation |
| 40.13 | -88.29  | 2015 | iNaturalist Research-grade Observation |
| 37.80 | -97.20  | 2018 | iNaturalist Research-grade Observation |
| 29.73 | -84.99  | 2018 | iNaturalist Research-grade Observation |
| 40.86 | -73.83  | 2018 | iNaturalist Research-grade Observation |
| 33.73 | -90.95  | 2018 | iNaturalist Research-grade Observation |
| 29.63 | -82.35  | 2017 | iNaturalist Research-grade Observation |
| 33.71 | -97.05  | 2018 | iNaturalist Research-grade Observation |
| 30.12 | -97.32  | 2018 | iNaturalist Research-grade Observation |
| 32.73 | -97.49  | 2018 | iNaturalist Research-grade Observation |
| 35.44 | -97.14  | 2018 | iNaturalist Research-grade Observation |
| 37.02 | -94.39  | 2018 | iNaturalist Research-grade Observation |
| 29.37 | -94.97  | 2016 | iNaturalist Research-grade Observation |
| 32.72 | -96.74  | 2018 | iNaturalist Research-grade Observation |
| 30.62 | -92.08  | 2016 | iNaturalist Research-grade Observation |
| 31.00 | -92.23  | 2017 | iNaturalist Research-grade Observation |
| 30.66 | -104.05 | 2013 | iNaturalist Research-grade Observation |
| 29.90 | -95.82  | 2017 | iNaturalist Research-grade Observation |
| 27.67 | -97.33  | 2017 | iNaturalist Research-grade Observation |
| 37.47 | -77.67  | 2017 | iNaturalist Research-grade Observation |
| 32.57 | -80.18  | 2015 | iNaturalist Research-grade Observation |
| 30.39 | -97.50  | 2017 | iNaturalist Research-grade Observation |
| 30.45 | -88.65  | 2009 | iNaturalist Research-grade Observation |
| 30.31 | -95.69  | 2017 | iNaturalist Research-grade Observation |
| 31.15 | -97.77  | 2017 | iNaturalist Research-grade Observation |
| 33.18 | -86.77  | 2017 | iNaturalist Research-grade Observation |
| 36.84 | -96.43  | 2017 | iNaturalist Research-grade Observation |
| 33.70 | -95.65  | 2017 | iNaturalist Research-grade Observation |
| 33.79 | -95.63  | 2017 | iNaturalist Research-grade Observation |
| 29.22 | -94.92  | 2015 | iNaturalist Research-grade Observation |
| 33.81 | -95.68  | 2017 | iNaturalist Research-grade Observation |
| 32.57 | -96.78  | 2017 | iNaturalist Research-grade Observation |
| 35.81 | -78.72  | 2017 | iNaturalist Research-grade Observation |
| 32.57 | -96.78  | 2017 | iNaturalist Research-grade Observation |
| 33.13 | -97.45  | 2017 | iNaturalist Research-grade Observation |
| 29.11 | -95.72  | 2016 | iNaturalist Research-grade Observation |
| 36.15 | -97.08  | 2012 | iNaturalist Research-grade Observation |
| 32.89 | -97.28  | 2016 | iNaturalist Research-grade Observation |
| 27.84 | -97.07  | 2016 | iNaturalist Research-grade Observation |
| 30.65 | -98.04  | 2010 | iNaturalist Research-grade Observation |
| 29.25 | -95.60  | 2016 | iNaturalist Research-grade Observation |
| 29.92 | -95.22  | 2016 | iNaturalist Research-grade Observation |

|       |         |                 |            |                                            |
|-------|---------|-----------------|------------|--------------------------------------------|
| 38.81 | -77.53  | 2016            |            | iNaturalist Research-grade Observation     |
| 32.59 | -97.10  | 2014            |            | iNaturalist Research-grade Observation     |
| 25.96 | -97.25  | 2015            |            | iNaturalist Research-grade Observation     |
| 30.42 | -97.76  | 2013            |            | iNaturalist Research-grade Observation     |
| 32.59 | -97.10  | 2014            |            | iNaturalist Research-grade Observation     |
| 27.48 | -81.56  | 1966            |            | Ohio State University Acarology Laboratory |
| 29.91 | -91.66  |                 |            | Ohio State University Acarology Laboratory |
| 29.29 | -82.11  | 1913            |            | Ohio State University Acarology Laboratory |
| 31.19 | -89.17  | 1944            |            | Ohio State University Acarology Laboratory |
| 23.07 | -99.12  | 2000            |            | Texas Natural History Collections          |
| 18.63 | -103.68 | 1990            |            | Texas Natural History Collections          |
| 31.43 | -111.19 | 2016            |            |                                            |
| 31.43 | -111.19 | 2016            |            |                                            |
| 31.40 | -111.19 | 2016            |            |                                            |
| 31.40 | -111.19 | 2016            |            |                                            |
| 31.41 | -111.18 | 2016            |            |                                            |
| 31.41 | -111.18 | 2016            |            |                                            |
| 31.71 | -110.79 | 2016            |            |                                            |
| 31.71 | -110.79 | 2016            |            |                                            |
| 31.70 | -110.79 | 2016            |            |                                            |
| 31.70 | -110.79 | 2016            |            |                                            |
| 31.86 | -110.21 | 2016            |            | [69]                                       |
| 31.86 | -110.21 | 2016            |            |                                            |
| 31.63 | -110.17 | 2016            |            |                                            |
| 31.63 | -110.17 | 2016            |            |                                            |
| 31.56 | -110.14 | 2016            |            |                                            |
| 31.56 | -110.14 | 2016            |            |                                            |
| 31.38 | -110.11 | 2016            |            |                                            |
| 31.38 | -110.11 | 2016            |            |                                            |
| 31.44 | -110.11 | 2016            |            |                                            |
| 31.44 | -110.11 | 2016            | Literature |                                            |
| 29.67 | -96.27  | 2013-2014       |            | [70]                                       |
| 30.12 | -85.72  | 1994-1996       |            | [10]                                       |
| 26.23 | -97.35  | 2015            |            |                                            |
| 26.08 | -97.30  | 2015            |            | [71]                                       |
| 39.26 | -75.47  | 2012            |            | [72]                                       |
| 38.44 | -76.10  | 2013            |            |                                            |
| 39.13 | -76.07  | 2013            |            | [14]                                       |
| 39.26 | -75.47  | 2013            |            |                                            |
| 26.07 | -81.41  | 1984-1990       |            |                                            |
| 25.85 | -80.93  | 1984-1990       |            | [73]                                       |
| 34.39 | -89.54  | 1982            |            |                                            |
| 33.48 | -88.84  | 1982            |            |                                            |
| 33.27 | -88.78  | 1982            |            | [74]                                       |
| 33.30 | -88.63  | 1982            |            |                                            |
| 36.78 | -88.05  | 1982            |            |                                            |
| 31.83 | -90.72  | 1994, 2001-2003 |            |                                            |
| 31.83 | -90.72  | 1994, 2001-2003 |            | [75]                                       |

|       |        |           |      |
|-------|--------|-----------|------|
| 30.42 | -88.67 | 2008-2009 | [76] |
| 30.42 | -88.67 | 2008-2009 |      |
| 38.85 | -77.40 | 2011      |      |
| 38.85 | -77.40 | 2011      | [19] |
| 38.85 | -77.40 | 2011      |      |
| 38.85 | -77.40 | 2011      |      |
| 33.27 | -88.78 | 1992-1993 | [23] |
| 30.23 | -88.02 | 1998      | [77] |
| 31.05 | -81.42 | 1996-1998 |      |
| 33.48 | -88.84 | 2013-2015 | [78] |
| 35.12 | -89.22 | 2012-2014 | [31] |
| 35.12 | -89.22 | 2012-2014 |      |
| 35.12 | -89.22 | 2013-2014 | [32] |
| 35.12 | -89.22 | 2013-2014 |      |
| 27.15 | -81.20 | 2015-2017 |      |
| 27.15 | -81.20 | 2015-2017 |      |
| 27.15 | -81.20 | 2015-2017 |      |
| 27.15 | -81.20 | 2015-2017 |      |
| 27.15 | -81.20 | 2015-2017 | [79] |
| 27.15 | -81.20 | 2015-2017 |      |
| 27.15 | -81.20 | 2015-2017 |      |
| 27.15 | -81.20 | 2015-2017 |      |
| 27.15 | -81.20 | 2015-2017 |      |
| 27.15 | -81.20 | 2015-2017 |      |
| 37.30 | -76.61 | 2010-2014 |      |
| 36.80 | -76.45 | 2010-2014 |      |
| 36.63 | -76.36 | 2010-2014 |      |
| 37.09 | -76.35 | 2010-2014 |      |
| 36.80 | -76.30 | 2010-2014 | [80] |
| 36.91 | -76.02 | 2010-2014 |      |
| 37.14 | -75.97 | 2010-2014 |      |
| 36.67 | -75.91 | 2010-2014 |      |
| 36.66 | -76.33 | 2008-2014 |      |
| 36.66 | -76.33 | 2008-2014 |      |
| 36.66 | -76.33 | 2008-2014 |      |
| 36.66 | -76.33 | 2008-2014 |      |
| 36.66 | -76.33 | 2008-2014 |      |
| 36.66 | -76.33 | 2008-2014 |      |
| 36.80 | -76.02 | 2008-2014 |      |
| 36.81 | -75.96 | 2008-2014 | [81] |
| 36.67 | -75.91 | 2008-2014 |      |
| 36.67 | -75.91 | 2008-2014 |      |
| 36.67 | -75.91 | 2008-2014 |      |
| 36.62 | -75.89 | 2008-2014 |      |
| 36.62 | -75.89 | 2008-2014 |      |
| 36.62 | -75.89 | 2008-2014 |      |
| 35.61 | -97.61 | 2015      |      |
| 35.61 | -97.61 | 2015      |      |
| 35.61 | -97.61 | 2015      | [36] |
| 35.48 | -97.46 | 2015      |      |

|       |        |           |      |
|-------|--------|-----------|------|
| 35.48 | -97.46 | 2015      |      |
| 35.48 | -97.46 | 2015      |      |
| 38.71 | -77.24 | 2010-2011 |      |
| 38.71 | -77.24 | 2010-2011 | [37] |
| 33.48 | -88.84 | 2005-2007 |      |
| 30.41 | -88.41 | 2005-2007 |      |
| 29.98 | -84.65 | 2005-2007 | [82] |
| 29.98 | -84.65 | 2005-2007 |      |
| 30.06 | -84.48 | 2005-2007 |      |
| 17.10 | -88.94 | 2014-2015 |      |
| 17.10 | -88.94 | 2014-2015 | [83] |
| 17.10 | -88.94 | 2014-2015 |      |
| 35.11 | -89.21 | 2013      |      |
| 35.11 | -89.21 | 2013      |      |
| 35.41 | -86.81 | 2013      | [41] |
| 35.41 | -86.81 | 2013      |      |
| 33.50 | -88.96 | 2012-2014 |      |
| 33.50 | -88.96 | 2012-2014 |      |
| 30.43 | -88.43 | 2012-2014 | [84] |
| 30.43 | -88.43 | 2012-2014 |      |
| 31.87 | -81.60 | 1996-1997 |      |
| 31.87 | -81.60 | 1996-1997 | [85] |
| 4.40  | -75.14 | 2014-2016 |      |
| 4.40  | -75.14 | 2014-2016 |      |
| 3.93  | -74.98 | 2014-2016 |      |
| 3.93  | -74.98 | 2014-2016 |      |
| 5.57  | -74.89 | 2014-2016 | [86] |
| 4.46  | -75.24 | 2014-2016 |      |
| 3.93  | -75.02 | 2014-2016 |      |
| 5.58  | -74.89 | 2014-2016 |      |
| 30.65 | -96.30 | 2012-2013 |      |
| 30.65 | -96.30 | 2012-2013 | [87] |
| 20.40 | -89.54 | 2012-2013 | [88] |
| 31.15 | -97.82 | 2008-2011 |      |
| 31.15 | -97.82 | 2008-2011 |      |
| 31.15 | -97.82 | 2008-2011 |      |
| 31.15 | -97.82 | 2008-2011 |      |
| 31.15 | -97.82 | 2008-2011 |      |
| 28.12 | -97.44 | 2008-2011 |      |
| 28.12 | -97.44 | 2008-2011 |      |
| 28.12 | -97.44 | 2008-2011 | [44] |
| 28.12 | -97.44 | 2008-2011 |      |
| 28.12 | -97.44 | 2008-2011 |      |
| 28.12 | -97.44 | 2008-2011 |      |
| 28.12 | -97.44 | 2008-2011 |      |
| 28.12 | -97.44 | 2008-2011 |      |
| 28.12 | -97.44 | 2008-2011 |      |
| 28.12 | -97.44 | 2008-2011 |      |
| 28.12 | -97.44 | 2008-2011 |      |
| 28.33 | -98.83 | 1996-1997 |      |
| 27.52 | -97.87 | 1996-1997 | [53] |



|       |        |                     |           |         |
|-------|--------|---------------------|-----------|---------|
| 28.36 | -97.21 | 1985, 1987,<br>1991 |           | [89]    |
| 36.78 | -88.07 | 1982                |           | [90]    |
| 36.92 | -87.98 | 1982                |           | [91]    |
| 28.36 | -97.21 | 1985-1987           |           | [92]    |
| 34.02 | -91.35 | 2000                |           |         |
| 35.12 | -89.22 | 2012                |           |         |
| 35.12 | -89.22 | 2012                |           |         |
| 35.12 | -89.22 | 2012                |           |         |
| 35.12 | -89.22 | 2012                |           |         |
| 35.12 | -89.22 | 2012                |           |         |
| 35.12 | -89.22 | 2012                |           |         |
| 35.12 | -89.22 | 2012                |           |         |
| 35.12 | -89.22 | 2012                |           |         |
| 35.12 | -89.22 | 2012                |           |         |
| 35.12 | -89.22 | 2012                |           |         |
| 35.12 | -89.22 | 2012                |           | [59]    |
| 35.12 | -89.22 | 2012                |           |         |
| 35.12 | -89.22 | 2012                |           |         |
| 35.12 | -89.22 | 2012                |           |         |
| 35.12 | -89.22 | 2012                |           |         |
| 35.12 | -89.22 | 2012                |           |         |
| 35.12 | -89.22 | 2012                |           |         |
| 35.12 | -89.22 | 2012                |           |         |
| 35.12 | -89.22 | 2012                |           |         |
| 35.12 | -89.22 | 2012                |           |         |
| 35.12 | -89.22 | 2012                |           |         |
| 35.12 | -89.22 | 2012                |           |         |
| 35.12 | -89.22 | 2012                |           |         |
| 35.12 | -89.22 | 2012                |           |         |
| 35.12 | -89.22 | 2012                |           |         |
| 42.57 | -79.04 | 1979                |           | [93]    |
| 35.77 | -78.64 | 1995-2010           | VectorMap |         |
| 37.15 | -76.59 | 1995-2010           | VectorMap |         |
| 32.50 | -93.65 | 1995-2010           | VectorMap |         |
| 32.95 | -79.95 | 1995-2010           | VectorMap |         |
| 30.43 | -86.69 | 1995-2010           | VectorMap |         |
| 30.63 | -87.04 | 1995-2010           | VectorMap |         |
| 31.33 | -89.29 | 1995-2010           | VectorMap |         |
| 34.61 | -98.39 | 1995-2010           | VectorMap |         |
| 35.50 | -76.45 | 1995-2010           | VectorMap | [66–68] |
| 38.57 | -77.33 | 1995-2010           | VectorMap |         |
| 27.95 | -99.73 | 1995-2010           | VectorMap |         |
| 34.01 | -77.98 | 1995-2010           | VectorMap |         |
| 37.08 | -76.37 | 1995-2010           | VectorMap |         |
| 38.70 | -77.15 | 1995-2010           | VectorMap |         |
| 30.14 | -85.74 | 1995-2010           | VectorMap |         |
| 27.75 | -98.08 | 1995-2010           | VectorMap |         |

---

|       |        |           |           |
|-------|--------|-----------|-----------|
| 33.71 | -84.44 | 1995-2010 | VectorMap |
| 40.72 | -89.60 | 1995-2010 | VectorMap |
| 27.48 | -81.56 | 1995-2010 | VectorMap |
| 29.91 | -91.66 | 1995-2010 | VectorMap |
| 29.29 | -82.11 | 1995-2010 | VectorMap |
| 30.40 | -88.89 | 1995-2010 | VectorMap |
| 31.19 | -89.17 | 1995-2010 | VectorMap |
| 32.05 | -96.47 | 1995-2010 | VectorMap |
| 33.09 | -79.46 | 1995-2010 | VectorMap |

\* *A. maculatum*: GBIF.org (accessed 17th September 2018) GBIF Occurrence Download  
<https://doi.org/10.15468/dl.vsfgy>

**Table S3.** Each geolocation recorded for ticks in the species *Amblyomma cajennense* in the literature and publicly available online databases.

| Latitude | Longitude | Year          | Data Source | Reference                                                     |
|----------|-----------|---------------|-------------|---------------------------------------------------------------|
| 26.31    | -109.03   | 1955          |             | Essig Museum of Entomology                                    |
| 28.03    | -97.51    | 1982          |             | Essig Museum of Entomology                                    |
| 18.09    | -96.14    | 1953          |             | Essig Museum of Entomology                                    |
| 28.03    | -97.51    | 1982          |             | Essig Museum of Entomology                                    |
| 18.13    | -96.14    | 1953          |             | Essig Museum of Entomology                                    |
| 28.03    | -97.51    | 1982          |             | Essig Museum of Entomology                                    |
| 28.03    | -97.51    | 1982          |             | Essig Museum of Entomology                                    |
| -20.51   | -54.62    | 2018          |             | iNaturalist Research-grade Observation                        |
| 28.65    | -97.38    | 2017          |             | iNaturalist Research-grade Observation                        |
| 26.09    | -98.14    | 2017          |             | iNaturalist Research-grade Observation                        |
| 20.49    | -105.44   | 2016          |             | iNaturalist Research-grade Observation                        |
| 23.30    | -106.44   | 2016          |             | iNaturalist Research-grade Observation                        |
| 23.30    | -106.44   | 2014          |             | iNaturalist Research-grade Observation                        |
| 23.30    | -106.44   | 2013          |             | iNaturalist Research-grade Observation                        |
| 23.30    | -106.44   | 2013          |             | iNaturalist Research-grade Observation                        |
| 16.91    | -92.09    | 1950          | GBIF*       | Illinois Natural History Survey                               |
| 16.91    | -92.09    | 1950          |             | Illinois Natural History Survey                               |
| 21.98    | -99.02    | Not specified |             | Illinois Natural History Survey                               |
| 20.67    | -88.57    | 1951          |             | Illinois Natural History Survey                               |
| 20.67    | -88.57    | 1951          |             | Illinois Natural History Survey                               |
| 17.07    | -92.25    | 1950          |             | Illinois Natural History Survey                               |
| 14.94    | -89.98    | 1959          |             | Illinois Natural History Survey                               |
| 18.66    | -95.40    | Not specified |             | Instituto de Diagnóstico y Referencia Epidemiológicos, Mexico |
| 21.98    | -99.01    | Not specified |             | Instituto de Diagnóstico y Referencia Epidemiológicos, Mexico |
| 18.66    | -95.40    | Not specified |             | Instituto de Diagnóstico y Referencia Epidemiológicos, Mexico |
| 18.66    | -95.40    | Not specified |             | Instituto de Diagnóstico y Referencia Epidemiológicos, Mexico |
| 21.59    | -105.17   | 1992          |             | Instituto de Diagnóstico y Referencia Epidemiológicos, Mexico |

|       |         |               |                                                               |
|-------|---------|---------------|---------------------------------------------------------------|
| 21.10 | -98.46  | 2009          | Instituto de Diagnóstico y Referencia Epidemiológicos, Mexico |
| 20.39 | -98.21  | 2011          | Instituto de Diagnóstico y Referencia Epidemiológicos, Mexico |
| 18.66 | -95.40  | Not specified | Instituto de Diagnóstico y Referencia Epidemiológicos, Mexico |
| 21.37 | -98.66  | Not specified | Instituto de Diagnóstico y Referencia Epidemiológicos, Mexico |
| 21.10 | -98.46  | 2009          | Instituto de Diagnóstico y Referencia Epidemiológicos, Mexico |
| 19.45 | -104.36 | 2007          | Instituto de Diagnóstico y Referencia Epidemiológicos, Mexico |
| 21.10 | -98.46  | 2009          | Instituto de Diagnóstico y Referencia Epidemiológicos, Mexico |
| 32.66 | -115.47 | 2009          | Instituto de Diagnóstico y Referencia Epidemiológicos, Mexico |
| 17.36 | -99.47  | 2012          | Instituto de Diagnóstico y Referencia Epidemiológicos, Mexico |
| 18.45 | -95.21  | Not specified | Instituto de Diagnóstico y Referencia Epidemiológicos, Mexico |
| 19.45 | -104.36 | 2010          | Instituto de Diagnóstico y Referencia Epidemiológicos, Mexico |
| 19.15 | -96.96  | Not specified | Instituto de Diagnóstico y Referencia Epidemiológicos, Mexico |
| 21.26 | -98.79  | Not specified | Instituto de Diagnóstico y Referencia Epidemiológicos, Mexico |
| 16.82 | -95.14  | 2011          | Instituto de Diagnóstico y Referencia Epidemiológicos, Mexico |
| 19.15 | -96.96  | Not specified | Instituto de Diagnóstico y Referencia Epidemiológicos, Mexico |
| 21.10 | -98.46  | 2009          | Instituto de Diagnóstico y Referencia Epidemiológicos, Mexico |
| 21.10 | -98.46  | 2009          | Instituto de Diagnóstico y Referencia Epidemiológicos, Mexico |
| 20.59 | -100.39 | 2012          | Instituto de Diagnóstico y Referencia Epidemiológicos, Mexico |
| 16.82 | -95.14  | 2011          | Instituto de Diagnóstico y Referencia Epidemiológicos, Mexico |
| 21.10 | -98.46  | 2009          | Instituto de Diagnóstico y Referencia Epidemiológicos, Mexico |
| 20.39 | -98.21  | 2011          | Instituto de Diagnóstico y Referencia Epidemiológicos, Mexico |
| 16.03 | -96.62  | 2008          | Instituto de Diagnóstico y Referencia Epidemiológicos, Mexico |
| 21.10 | -98.46  | 2009          | Instituto de Diagnóstico y Referencia Epidemiológicos, Mexico |
| 21.37 | -98.66  | Not specified | Instituto de Diagnóstico y Referencia Epidemiológicos, Mexico |
| 16.82 | -95.14  | 2011          | Instituto de Diagnóstico y Referencia Epidemiológicos, Mexico |
| 21.59 | -105.17 | 1992          | Instituto de Diagnóstico y Referencia Epidemiológicos, Mexico |
| 16.82 | -95.14  | 2011          | Instituto de Diagnóstico y Referencia Epidemiológicos, Mexico |
| 21.37 | -98.66  | Not specified | Instituto de Diagnóstico y Referencia Epidemiológicos, Mexico |
| 16.82 | -95.14  | 2011          | Instituto de Diagnóstico y Referencia Epidemiológicos, Mexico |

|        |        |               |                                                                  |
|--------|--------|---------------|------------------------------------------------------------------|
| 18.66  | -95.40 | Not specified | Instituto de Diagnóstico y Referencia<br>Epidemiológicos, Mexico |
| 16.82  | -95.14 | 2011          | Instituto de Diagnóstico y Referencia<br>Epidemiológicos, Mexico |
| -3.14  | -60.02 | 1977          | Instituto Nacional de Pesquisas da Amazônia                      |
| 29.42  | -98.49 | Not specified | Ohio State University Acarology Laboratory                       |
| -11.43 | -61.45 | 2015-2016     |                                                                  |
| -11.67 | -61.19 | 2015-2016     | [94]                                                             |
| -12.73 | -60.14 | 2015-2016     |                                                                  |
| 27.57  | -99.43 | 2005-2008     | [95]                                                             |
| -22.69 | -47.25 | 2009-2010     |                                                                  |
| -22.72 | -47.32 | 2009-2010     |                                                                  |
| -22.70 | -47.30 | 2009-2010     | [96]                                                             |
| -22.69 | -47.29 | 2009-2010     |                                                                  |
| -22.75 | -47.27 | 2009-2010     |                                                                  |
| -22.69 | -47.29 | 2009-2010     |                                                                  |
| -8.38  | -35.45 | 2007-2008     |                                                                  |
| -8.20  | -35.56 | 2007-2008     | [97]                                                             |
| -8.33  | -35.71 | 2007-2008     |                                                                  |
| -20.44 | -54.65 | 2012          | [98]                                                             |
| -19.13 | -56.77 | 1996-1999     | [99]                                                             |
| 14.04  | -90.08 | 2007          | [100]                                                            |
| -18.93 | -48.26 | 2010          | [101]                                                            |
| -21.99 | -47.42 | 1997-1999     | [102]                                                            |
| 14.58  | -88.58 | Not specified | [103]                                                            |
| -22.68 | -42.78 | 2006          |                                                                  |
| -22.89 | -42.99 | 2006          | [104]                                                            |
| -22.12 | -43.17 | 2006          |                                                                  |
| -22.20 | -44.97 | 2006          | Literature                                                       |
| -22.12 | -43.21 | 2007-2008     |                                                                  |
| -22.78 | -41.96 | 2007-2008     |                                                                  |
| -22.20 | -44.97 | 2007-2008     | [105]                                                            |
| 29.56  | -98.75 | 2007-2008     |                                                                  |
| 29.81  | -95.60 | 2007-2008     |                                                                  |
| 30.28  | -97.90 | 2007-2008     |                                                                  |
| -24.90 | -64.95 | 1986-1988     | [106]                                                            |
| -5.99  | -48.63 | 2012          |                                                                  |
| -6.11  | -48.59 | 2012          |                                                                  |
| -12.39 | -49.12 | 2012          |                                                                  |
| -7.33  | -48.30 | 2012          |                                                                  |
| -6.59  | -48.64 | 2012          |                                                                  |
| -6.86  | -48.52 | 2012          |                                                                  |
| -9.86  | -48.72 | 2012          |                                                                  |
| -8.48  | -48.48 | 2012          | [107]                                                            |
| -11.04 | -48.75 | 2012          |                                                                  |
| -11.90 | -49.17 | 2012          |                                                                  |
| -11.21 | -48.93 | 2012          |                                                                  |
| -12.23 | -49.17 | 2012          |                                                                  |
| -8.98  | -48.50 | 2012          |                                                                  |
| -11.83 | -49.13 | 2012          |                                                                  |
| -9.42  | -48.57 | 2012          |                                                                  |

|        |        |               |       |
|--------|--------|---------------|-------|
| -7.80  | -48.46 | 2012          |       |
| -10.57 | -48.92 | 2012          |       |
| -10.91 | -48.91 | 2012          |       |
| -5.97  | -47.88 | 2012          |       |
| -12.79 | -49.09 | 2012          |       |
| -6.25  | -47.46 | 2012          |       |
| -6.34  | -47.55 | 2012          |       |
| -6.41  | -48.54 | 2012          |       |
| -4.52  | -46.78 | 2012          |       |
| -6.34  | -47.41 | 2012          |       |
| -2.26  | -45.27 | 2012          |       |
| -3.88  | -45.55 | 2012          |       |
| -4.08  | -45.95 | 2012          |       |
| -12.88 | -49.11 | 2012          |       |
| -11.87 | -61.00 | 2012          |       |
| -11.16 | -61.90 | 2012          |       |
| -12.72 | -60.26 | 2012          |       |
| -12.49 | -60.47 | 2012          |       |
| -13.94 | -59.76 | 2012          |       |
| -13.32 | -59.88 | 2012          |       |
| -13.00 | -59.96 | 2012          |       |
| -14.78 | -59.35 | 2012          |       |
| -14.17 | -59.70 | 2012          |       |
| -14.13 | -59.71 | 2012          |       |
| -14.93 | -60.02 | 2012          |       |
| -13.76 | -55.87 | 2013          |       |
| -11.93 | -55.70 | 2013          |       |
| -13.76 | -55.87 | 2013          |       |
| -1.83  | -45.38 | 2012          |       |
| -1.67  | -47.77 | 2011          |       |
| -6.10  | -48.58 | 2012          |       |
| -12.05 | -63.57 | 2011          |       |
| -12.73 | -60.13 | 2002          |       |
| -10.60 | -49.18 | 2011          |       |
| -2.45  | -44.78 | 2012          |       |
| -3.73  | -43.35 | 2012          |       |
| -2.55  | -59.78 | 2012          |       |
| -3.68  | -45.40 | 2012          |       |
| -13.08 | -59.88 | 2012          |       |
| -10.63 | -51.57 | 2011          |       |
| -15.15 | -59.47 | 2012          |       |
| -11.87 | -55.60 | 2013          |       |
| -18.26 | -52.94 | 1999-2008     | [108] |
| -24.68 | -64.60 | Not specified | [109] |
| -25.92 | -61.72 | Not specified |       |
| -19.00 | -56.63 | 2006-2007     |       |
| -18.99 | -56.60 | 2006-2007     |       |
| -18.98 | -56.64 | 2006-2007     | [110] |
| -18.98 | -56.64 | 2006-2007     |       |
| -18.99 | -56.63 | 2006-2007     |       |

|        |        |           |       |
|--------|--------|-----------|-------|
| -19.02 | -56.66 | 2006-2007 |       |
| -19.02 | -56.64 | 2006-2007 |       |
| -18.97 | -56.60 | 2006-2007 |       |
| -18.98 | -56.64 | 2006-2007 |       |
| -18.98 | -56.60 | 2006-2007 |       |
| -18.98 | -56.63 | 2006-2007 |       |
| -18.99 | -56.62 | 2006-2007 |       |
| -18.98 | -56.65 | 2006-2007 |       |
| -18.99 | -56.63 | 2006-2007 |       |
| -18.99 | -56.66 | 2006-2007 |       |
| -18.99 | -56.66 | 2006-2007 |       |
| -18.98 | -56.64 | 2006-2007 |       |
| -19.00 | -56.63 | 2006-2007 |       |
| -18.99 | -56.63 | 2006-2007 |       |
| 8.52   | -75.84 | 2009      | [111] |
| -20.07 | -50.15 | 2012      | [112] |
| -21.20 | -61.65 | 2012      | [112] |
| -14.44 | -39.17 | 2009      | [113] |
| -22.53 | -52.18 | 2004-2006 | [113] |
| -19.62 | -44.03 | 1995-1997 | [114] |
| -19.62 | -42.03 | 1995-1997 | [115] |
| -21.70 | -43.44 | 2008      | [116] |
| -21.72 | -43.41 | 2008      | [116] |
| -22.60 | -43.71 | 2012      | [117] |
| -22.60 | -43.71 | 2012      | [117] |
| -19.83 | -43.83 | 1997      | [118] |
| 27.65  | -98.20 | 2005-2006 | [119] |
| -18.60 | -45.35 | 2005-2010 |       |
| -16.35 | -46.90 | 2005-2010 |       |
| -20.61 | -42.14 | 2005-2010 | [120] |
| -19.03 | -43.42 | 2005-2010 |       |
| -19.61 | -43.22 | 2005-2010 |       |
| -21.20 | -51.84 | 2008-2009 |       |
| -21.12 | -51.76 | 2008-2009 |       |
| -21.13 | -51.77 | 2008-2009 |       |
| -21.15 | -51.77 | 2008-2009 |       |
| -21.15 | -51.74 | 2008-2009 |       |
| -21.18 | -51.79 | 2008-2009 | [121] |
| -21.23 | -51.81 | 2008-2009 |       |
| -21.27 | -51.84 | 2008-2009 |       |
| -21.27 | -51.84 | 2008-2009 |       |
| -21.29 | -51.83 | 2008-2009 |       |
| -22.41 | -42.96 | 2009-2010 | [122] |
| -13.72 | -50.79 | 2004-2005 |       |
| -13.72 | -50.79 | 2004-2005 |       |
| -13.73 | -50.79 | 2004-2005 |       |
| -13.74 | -50.79 | 2004-2005 | [123] |
| -13.74 | -50.79 | 2004-2005 |       |
| -13.72 | -50.78 | 2004-2005 |       |
| -13.72 | -50.78 | 2004-2005 |       |

|        |        |               |           |         |
|--------|--------|---------------|-----------|---------|
| -13.75 | -50.82 | 2004-2005     |           |         |
| -15.06 | -50.40 | 2004-2005     |           |         |
| -15.07 | -50.40 | 2004-2005     |           |         |
| -15.06 | -50.43 | 2004-2005     |           |         |
| -15.01 | -50.41 | 2004-2005     |           |         |
| -15.00 | -50.40 | 2004-2005     |           |         |
| -21.12 | -51.77 | 2002-2003     |           |         |
| -21.12 | -51.77 | 2002-2003     |           |         |
| -21.12 | -51.77 | 2002-2003     |           |         |
| -21.12 | -51.77 | 2002-2003     |           |         |
| -21.12 | -51.79 | 2002-2003     |           | [124]   |
| -21.12 | -51.79 | 2002-2003     |           |         |
| -21.11 | -51.80 | 2002-2003     |           |         |
| -21.10 | -51.72 | 2002-2003     |           |         |
| -21.10 | -51.71 | 2002-2003     |           |         |
| -21.08 | -51.71 | 2002-2003     |           |         |
| -21.74 | -52.27 | Not specified |           | [125]   |
| -23.32 | -51.15 | 2007          |           | [126]   |
| -23.35 | -51.14 | 2006-2007     |           | [127]   |
| -19.17 | -48.38 | 2006-2008     |           | [128]   |
| -25.92 | -61.72 | 1995-2010     |           |         |
| -18.98 | -56.65 | 1995-2010     |           |         |
| 9.72   | -82.86 | 1995-2010     |           |         |
| 9.90   | -83.68 | 1995-2010     |           |         |
| 5.02   | -74.47 | 1995-2010     |           |         |
| -23.02 | -45.55 | 1995-2010     |           |         |
| -24.68 | -64.60 | 1995-2010     |           |         |
| -10.63 | -63.52 | 1995-2010     |           |         |
| 8.62   | -80.13 | 1995-2010     |           |         |
| -21.99 | -47.42 | 1995-2010     |           |         |
| -19.73 | -43.26 | 1995-2010     |           |         |
| 27.75  | -98.08 | 1995-2010     |           |         |
| -19.48 | -57.01 | 1995-2010     |           |         |
| -23.32 | -51.17 | 1995-2010     | VectorMap | [66-68] |
| -13.73 | -50.79 | 1995-2010     |           |         |
| -15.01 | -50.41 | 1995-2010     |           |         |
| 27.95  | -99.73 | 1995-2010     |           |         |
| 28.04  | -97.51 | 1995-2010     |           |         |
| 28.04  | -97.51 | 1995-2010     |           |         |
| 28.04  | -97.51 | 1995-2010     |           |         |
| 16.91  | -92.09 | 1995-2010     |           |         |
| 16.91  | -92.09 | 1995-2010     |           |         |
| 18.10  | -96.12 | 1995-2010     |           |         |
| 24.86  | -99.57 | 1995-2010     |           |         |
| 24.86  | -99.57 | 1995-2010     |           |         |
| 29.42  | -98.49 | 1995-2010     |           |         |

---

\* *A. cajennense*: GBIF.org (accessed 3rd January 2019) GBIF Occurrence Download  
<https://doi.org/10.15468/dl.i4dp2i>

**Table S4.** Each geolocation recorded for ticks in the species *Amblyomma mixtum* in the literature and publicly available online databases.

| Latitude | Longitude | Year          | Data Source | Reference |       |
|----------|-----------|---------------|-------------|-----------|-------|
| -98.75   | 25.80     | 1995-2010     | GBIF*       |           |       |
| -99.73   | 27.95     | Not specified |             | [129]     |       |
| -97.35   | 26.23     | 2015          |             | [71]      |       |
| -92.99   | 17.97     | 2014-2015     |             | [130]     |       |
| -78.74   | 9.20      | 2010-2013     |             |           |       |
| -79.60   | 9.01      | 2010-2013     |             | [131]     |       |
| -79.70   | 9.12      | 2010-2013     |             |           |       |
| -79.96   | 9.20      | 2010-2013     |             |           |       |
| -87.46   | 15.77     | 2014          |             | [132]     |       |
| -70.75   | 7.07      | 2014-2016     |             |           |       |
| -72.20   | 5.64      | 2014-2016     |             |           |       |
| -72.39   | 5.33      | 2014-2016     |             | [86]      |       |
| -73.88   | 3.37      | 2014-2016     |             |           |       |
| -75.52   | 5.17      | 2014-2016     |             |           |       |
| -88.16   | 21.15     | 2009-2014     | Literature  |           |       |
| -88.18   | 21.02     | 2009-2014     |             |           |       |
| -88.20   | 20.69     | 2009-2014     |             |           |       |
| -88.20   | 20.80     | 2009-2014     |             |           |       |
| -88.27   | 21.30     | 2009-2014     |             |           |       |
| -88.60   | 20.97     | 2009-2014     |             |           |       |
| -88.75   | 20.90     | 2009-2014     |             |           | [88]  |
| -88.92   | 20.12     | 2009-2014     |             |           |       |
| -89.05   | 20.07     | 2009-2014     |             |           |       |
| -89.53   | 20.92     | 2009-2014     |             |           |       |
| -89.54   | 20.40     | 2009-2014     |             |           |       |
| -89.63   | 20.97     | 2009-2014     |             |           |       |
| -89.71   | 20.49     | 2009-2014     |             |           |       |
| -105.08  | 19.55     | 2013          |             |           | [133] |
| -82.83   | 9.73      | 2008-2012     |             |           | [134] |
| -83.68   | 9.90      | 2008-2012     |             |           |       |

\* *A. mixtum*: GBIF.org (accessed 3rd January 2019). GBIF Occurrence Download <https://doi.org/10.15468/dl.izikpz>.

## References

1. Al-Warid, H.S.; Beringer, J.; Hiller, T.L.; Belant, J.L.; Gompper, M.E. Community composition of Ixodid ticks parasitizing American black bears in Missouri, USA. *Ursus* **2017**, *27*, 61–66.
2. Allan, B.F. Influence of prescribed burns on the abundance of *Amblyomma americanum* (Acari: Ixodidae) in the Missouri Ozarks. *J. Med. Entomol.* **2009**, *46*, 1030–1036.
3. Bacon, R.M.; Gilmore, R.D.; Quintana, M.; Piesman, J.; Johnson, B.J.B. DNA evidence of *Borrelia lonestari* in *Amblyomma americanum* (Acari: Ixodidae) in southeast Missouri. *J. Med. Entomol.* **2003**, *40*, 590–592.
4. Bissinger, B.W.; Apperson, C.S.; Watson, D.W.; Arellano, C.; Sonenshine, D.E.; Roe, R.M. Novel field assays and the comparative repellency of BioUD®, DEET and permethrin against *Amblyomma americanum*. *Med. Vet. Entomol.* **2011**, *25*, 217–226.
5. Bouzek, D.C.; Foré, S.A.; Bevell, J.G.; Kim, H.-J. A conceptual model of the *Amblyomma americanum* life cycle in northeast Missouri. *J. Vector Ecol.* **2013**, *38*, 74–81.



6. Carroll, J.F.; Klun, J.A.; Kramer, M. Similarity in responses of laboratory-reared and field-collected lone star tick (Acari: Ixodidae) nymphs to repellents. *J. Entomol. Sci.* **2008**, *43*, 426–430.
7. Carroll, J.F.; Pound, J.M.; Miller, J.A.; Kramer, M. Sustained control of Gibson Island, Maryland, populations of *Ixodes scapularis* and *Amblyomma americanum* (Acari: Ixodidae) by community-administered 4-Poster deer self-treatment bait stations. *Vector Borne Zoonotic Dis.* **2009**, *9*, 417–421.
8. Castellaw, A.H.; Showers, J.; Goddard, J.; Chenney, E.F.; Varela-Stokes, A.S. Detection of vector-borne agents in lone star ticks, *Amblyomma americanum* (Acari: Ixodidae), from Mississippi. *J. Med. Entomol.* **2010**, *47*, 473–476.
9. Chitwood, M.C.; Swingen, M.B.; Lashley, M.A.; Flowers, J.R.; Palamar, M.B.; Apperson, C.S.; Olfenbittel, C.; Moorman, C.E.; DePerno, C.S. Parasitology and serology of free-ranging coyotes (*Canis latrans*) in North Carolina, USA. *J. Wildl. Dis.* **2015**, *51*, 664–669.
10. Cilek, J.E.; Olson, M.A. Seasonal distribution and abundance of ticks (Acari: Ixodidae) in northwestern Florida. *J. Med. Entomol.* **2000**, *37*, 439–444.
11. Cully Jr., J.F. Lone star tick abundance, fire, and bison grazing in tallgrass prairie. *J. Range Manag.* **1999**, *52*, 139.
12. Davidson, W.R.; Siefken, D.A.; Creekmore, L.H. Seasonal and annual abundance of *Amblyomma americanum* (Acari: Ixodidae) in central Georgia. *J. Med. Entomol.* **1994**, *31*, 67–71.
13. Durden, L.A.; Luckhart, S.; Mullen, G.R.; Smith, S. Tick infestations of white-tailed deer in Alabama. *J. Wildl. Dis.* **1991**, *27*, 606–614.
14. Florin, D.A.; Brinkerhoff, R.J.; Gaff, H.; Jiang, J.; Robbins, R.G.; Eickmeyer, W.; Butler, J.; Nielsen, D.; Wright, C.; White, A.; et al. Additional U.S. collections of the Gulf Coast tick, *Amblyomma maculatum* (Acari: Ixodidae), from the State of Delaware, the first reported field collections of adult specimens from the State of Maryland, and data regarding this tick from surveillance of migratory songbirds in Maryland. *Syst. Appl. Acarol.* **2014**, *19*, 257–262.
15. Ginsberg, H.S.; Ewing, C.P. Comparison of flagging, walking, trapping, and collecting from hosts as sampling methods for northern deer ticks, *Ixodes dammini*, and lone-star ticks, *Amblyomma americanum* (Acari: Ixodidae). *Exp. Appl. Acarol.* **1989**, *7*, 313–322.
16. Goddard, J.; Sumner, J.W.; Nicholson, W.L.; Paddock, C.D.; Shen, J.; Piesman, J. Survey of ticks collected in Mississippi for *Rickettsia*, *Ehrlichia*, and *Borrelia* species. *J. Vector Ecol.* **2003**, *28*, 184–189.
17. Han, G.S.; Stromdahl, E.Y.; Wong, D.; Weltman, A.C. Exposure to *Borrelia burgdorferi* and other tick-borne pathogens in Gettysburg National Military Park, South-Central Pennsylvania, 2009. *Vector Borne Zoonotic Dis.* **2014**, *14*, 227–233.
18. Heise, S.R.; Elshahed, M.S.; Little, S.E. Bacterial diversity in *Amblyomma americanum* (Acari: Ixodidae) with a focus on members of the genus *Rickettsia*. *J. Med. Entomol.* **2010**, *47*, 258–268.
19. Henning, T.C.; Orr, J.M.; Smith, J.D.; Arias, J.R.; Rasgon, J.L.; Norris, D.E. Discovery of filarial nematode DNA in *Amblyomma americanum* in Northern Virginia. *Ticks Tick Borne Dis.* **2016**, *7*, 315–318.
20. Hudman, D.A.; Sargentini, N.J. Detection of *Borrelia*, *Ehrlichia*, and *Rickettsia* spp. in ticks in northeast Missouri. *Ticks and Tick-borne Dis.* **2016**, *7*, 915–921.
21. Hughes, T.H.; Richardson, A.G.; Hoel, D.F.; Mejeoumov, T.; Farooq, M.; Stoops, C.A. Suppression of *Amblyomma americanum* (Ixodida: Ixodidae) for short-term field operations utilizing cypermethrin and lambda-cyhalothrin. *J. Med. Entomol.* **2014**, *51*, 709–712.
22. Ijdo, J.W.; Wu, C.; Magnarelli, L.A.; Stafford, K.C.; Anderson, J.F.; Fikrig, E. Detection of *Ehrlichia chaffeensis* DNA in *Amblyomma americanum* ticks in Connecticut and Rhode Island. *J. Clin. Microbiol.* **2000**, *38*, 4655–4656.
23. Jackson, L.K.; Gaydon, D.M.; Goddard, J. Seasonal activity and relative abundance of *Amblyomma americanum* in Mississippi. *J. Med. Entomol.* **1996**, *33*, 128–131.
24. Jiang, J.; Yarina, T.; Miller, M.K.; Stromdahl, E.Y.; Richards, A.L. Molecular detection of *Rickettsia amblyommii* in *Amblyomma americanum* parasitizing humans. *Vector Borne Zoonotic Dis.* **2010**, *10*, 329–340.
25. Kensinger, B.J.; Allan, B.F. Efficacy of dry ice-baited traps for sampling *Amblyomma americanum* (Acari: Ixodidae) varies with life stage but not habitat. *J. Med. Entomol.* **2011**, *48*, 708–711.
26. Killmaster, L.F.; Loftis, A.D.; Zemtsova, G.E.; Levin, M.L. Detection of bacterial agents in *Amblyomma americanum* (Acari: Ixodidae) from Georgia, USA, and the use of a multiplex assay to differentiate *Ehrlichia chaffeensis* and *Ehrlichia ewingii*. *J. Med. Entomol.* **2014**, *51*, 868–872.
27. Kinzer, D.R.; Presley, S.M.; Hair, J.A. Comparative efficiency of flagging and carbon dioxide-baited sticky traps for collecting the lone star tick, *Amblyomma americanum* (Acarina: Ixodidae). *J. Med. Entomol.* **1990**, *27*, 750–755.
28. Lepitzki, D.A.; Woolf, A.; Bunn, B.M. Parasites of cottontail rabbits of southern Illinois. *J. Parasitol.* **1992**, *78*, 1080–1083.
29. Long, S.W.; Pound, J.M.; Yu, X. *Ehrlichia* prevalence in *Amblyomma americanum*, central Texas. *Emerg. Infect. Dis.* **2004**, *10*, 1342–1343.
30. Maegli, A.; Loy, J.D.; Cortinas, R. Note on *Ehrlichia chaffeensis*, *Ehrlichia ewingii*, and “*Borrelia lonestari*” infection in lone star ticks (Acari: Ixodidae), Nebraska, USA. *Ticks Tick-borne Dis.* **2016**, *7*, 154–158.
31. Mays, S.E.; Houston, A.E.; Trout Fryxell, R.T. Specifying pathogen associations of *Amblyomma maculatum* (Acari: Ixodidae) in western Tennessee. *J. Med. Entomol.* **2016**, *53*, 435–440.

32. Mays, S.E.; Houston, A.E.; Trout Fryxell, R.T. Comparison of novel and conventional methods of trapping ixodid ticks in the southeastern U.S.A. *Med. Vet. Entomol.* **2016**, *30*, 123–134.
33. Mixson, T.R.; Lydy, S.L.; Dasch, G.A.; Real, L.A. Inferring the population structure and demographic history of the tick, *Amblyomma americanum* Linnaeus. *J. Vector Ecol.* **2006**, *31*, 181–192.
34. Monzón, J.D.; Atkinson, E.G.; Henn, B.M.; Benach, J.L. Population and evolutionary genomics of *Amblyomma americanum*, an expanding arthropod disease vector. *Genome Biol. Evol.* **2016**, *8*, 1351–1360.
35. Noden, B.H.; Dubie, T. Involvement of invasive eastern red cedar (*Juniperus virginiana*) in the expansion of *Amblyomma americanum* in Oklahoma. *J. Vector Ecol.* **2017**, *42*, 178–183.
36. Noden, B.H.; Loss, S.R.; Maichak, C.; Williams, F. Risk of encountering ticks and tick-borne pathogens in a rapidly growing metropolitan area in the U.S. Great Plains. *Ticks Tick-borne Dis.* **2017**, *8*, 119–124.
37. Orr, J.M.; Smith, J.D.; Zawada, S.G.; Arias, J.R. Diel and seasonal activity and trapping of ticks (Acari: Ixodidae) in Northern Virginia, U.S.A. *Syst. Appl. Acarol.* **2013**, *18*, 105–111.
38. Ouellette, J.; Apperson, C.S.; Howard, P.; Evans, T.L.; Levine, J.F. Tick-raccoon associations and the potential for Lyme disease spirochete transmission in the coastal plain of North Carolina. *J. Wildl. Dis.* **1997**, *33*, 28–39.
39. Petry, W.K.; Foré, S.A.; Fielden, L.J.; Kim, H.-J. A quantitative comparison of two sample methods for collecting *Amblyomma americanum* and *Dermacentor variabilis* (Acari: Ixodidae) in Missouri. *Exp. Appl. Acarol.* **2010**, *52*, 427–438.
40. Polito, V.J.; Baum, K.A.; Payton, M.E.; Little, S.E.; Fuhlendorf, S.D.; Reichard, M.V. Tick abundance and levels of infestation on cattle in response to patch burning. *Rangeland Ecology & Management* **2013**, *66*, 545–552.
41. Pompo, K.; Mays, S.; Wesselman, C.; Paulsen, D.J.; Trout Fryxell, R.T. Survey of ticks collected from Tennessee cattle and their pastures for *Anaplasma* and *Ehrlichia* species. *J. Parasitol.* **2016**, *102*, 54–59.
42. Ponnusamy, L.; Gonzalez, A.; Treuren, W.V.; Weiss, S.; Parobek, C.M.; Juliano, J.J.; Knight, R.; Roe, R.M.; Apperson, C.S.; Meshnick, S.R. Diversity of *Rickettsiales* in the microbiome of the lone star tick, *Amblyomma americanum*. *Appl. Environ. Microbiol.* **2014**, *80*, 354–359.
43. Rawlings, J.A.; Teltow, G.J. Prevalence of *Borrelia* (Spirochaetaceae) spirochetes in Texas ticks. *J. Med. Entomol.* **1994**, *31*, 297–301.
44. Sanders, D.M.; Schuster, A.L.; McCardle, P.W.; Strey, O.F.; Blankenship, T.L.; Teel, P.D. Ixodid ticks associated with feral swine in Texas. *J. Vector Ecol.* **2013**, *38*, 361–373.
45. Sardelis, M.R.; Neidhardt, K.; Perich, M.J.; Milstrey, E.G.; Harlan, H.J.; Boobar, L.R. Reduction of the *Amblyomma americanum* (Acari: Ixodidae) population at Fort A.P. Hill, Virginia, by aerial application of diazinon granules: correlation of percentage control with received dose. *J. Med. Entomol.* **1989**, *26*, 494–496.
46. Savage, H.; Burkhalter, K.L.; Godsey, M.S.; Panella, N.A.; Ashley, D.C.; Nicholson, W.L.; Lambert, A.J. Bourbon virus in field-collected ticks, Missouri, USA. *Emerg. Infect. Dis.* **2017**, *23*, 2017–2022.
47. Sayler, K.A.; Wamsley, H.L.; Pate, M.; Barbet, A.F.; Alleman, A.R. Cultivation of *Rickettsia amblyommii* in tick cells, prevalence in Florida lone star ticks (*Amblyomma americanum*). *Parasites & Vectors* **2014**, *7*, 270.
48. Sayler, K.A.; Loftis, A.D.; Beatty, S.K.; Boyce, C.L.; Garrison, E.; Clemons, B.; Cunningham, M.; Alleman, A.R.; Barbet, A.F. Prevalence of tick-borne pathogens in host-seeking *Amblyomma americanum* (Acari: Ixodidae) and *Odocoileus virginianus* (Artiodactyla: Cervidae) in Florida. *J. Med. Entomol.* **2016**, *53*, 949–956.
49. Schulze, T.L.; Jordan, R.A.; Schulze, C.J.; Mixson, T.; Papero, M. Relative encounter frequencies and prevalence of selected *Borrelia*, *Ehrlichia*, and *Anaplasma* infections in *Amblyomma americanum* and *Ixodes scapularis* (Acari: Ixodidae) ticks from central New Jersey. *J. Med. Entomol.* **2005**, *42*, 450–456.
50. Schulze, T.L.; Jordan, R.A.; Healy, S.P.; Roegner, V.E.; Meddis, M.; Jahn, M.B.; Guthrie Sr., D.L. Relative abundance and prevalence of selected *Borrelia* infections in *Ixodes scapularis* and *Amblyomma americanum* (Acari: Ixodidae) from publicly owned lands in Monmouth County, New Jersey. *J. Med. Entomol.* **2006**, *43*, 1269–1275.
51. Schulze, T.L.; Jordan, R.A.; White, J.C.; Roegner, V.E.; Healy, S.P. Geographical distribution and prevalence of selected *Borrelia*, *Ehrlichia*, and *Rickettsia* infections in *Amblyomma americanum* (Acari: Ixodidae) in New Jersey. *J. Am. Mosq. Control Assoc.* **2011**, *27*, 236–244.
52. Semtner, P.J.; Howell, D.E.; Hair, J.A. The ecology and behavior of the lone star tick (Acarina: Ixodidae) I. The relationship between vegetative habitat type and tick abundance and distribution in Cherokee Co., Oklahoma. *J. Med. Entomol.* **1971**, *8*, 329–335.
53. Shender, L.A.; Botzler, R.G.; George, T.L. Analysis of serum and whole blood values in relation to helminth and ectoparasite infections of feral pigs in Texas. *J. Wildl. Dis.* **2002**, *38*, 385–394.
54. Stein, K.J.; Waterman, M.; Waldon, J.L. The effects of vegetation density and habitat disturbance on the spatial distribution of ixodid ticks (Acari: Ixodidae). *Geospat. Health* **2008**, *2*, 241–252.
55. Stromdahl, E.Y.; Vince, M.A.; Billingsley, P.M.; Dobbs, N.A.; Williamson, P.C. *Rickettsia amblyommii* infecting *Amblyomma americanum* larvae. *Vector Borne Zoonotic Dis.* **2008**, *8*, 15–24.
56. Tokarz, R.; Williams, S.H.; Sameroff, S.; Sanchez Leon, M.; Jain, K.; Lipkin, W.I. Virome analysis of *Amblyomma americanum*, *Dermacentor variabilis*, and *Ixodes scapularis* ticks reveals novel highly divergent vertebrate and invertebrate viruses. *J. Virol.* **2014**, *88*, 11480–11492.

57. Tokarz, R.; Sameroff, S.; Tagliaferro, T.; Jain, K.; Williams, S.H.; Cucura, D.M.; Rochlin, I.; Monzon, J.; Carpi, G.; Tufts, D.; et al. Identification of novel viruses in *Amblyomma americanum*, *Dermacentor variabilis*, and *Ixodes scapularis* ticks. *mSphere* **2018**, *3*, e00614-17.
58. Trout Fryxell, R.T.; Moore, J.E.; Collins, M.D.; Kwon, Y.; Jean-Philippe, S.R.; Schaeffer, S.M.; Odoi, A.; Kennedy, M.; Houston, A.E. Habitat and vegetation variables are not enough when predicting tick populations in the southeastern United States. *PLOS One* **2015**, *10*, e0144092.
59. Trout Fryxell, R.T.; Hendricks, B.M.; Pompo, K.; Mays, S.E.; Paulsen, D.J.; Operario, D.J.; Houston, A.E. Investigating the adult Ixodid tick populations and their associated *Anaplasma*, *Ehrlichia*, and *Rickettsia* bacteria at a Rocky Mountain spotted fever hotspot in western Tennessee. *Vector-Borne Zoonotic Dis.* **2017**, *17*, 527–538.
60. Whitlock, J.E.; Fang, Q.Q.; Durden, L.A.; Oliver, J.H. Prevalence of *Ehrlichia chaffeensis* (Rickettsiales: Rickettsiaceae) in *Amblyomma americanum* (Acari: Ixodidae) from the Georgia coast and Barrier Islands. *J. Med. Entomol.* **2000**, *37*, 276–280.
61. Williams-Newkirk, A.J.; Rowe, L.A.; Mixson-Hayden, T.R.; Dasch, G.A. Characterization of the bacterial communities of life stages of free living lone star ticks (*Amblyomma americanum*). *PLOS One* **2014**, *9*, e102130.
62. Willis, D.; Carter, R.; Murdock, C.; Blair, B. Relationship between habitat type, fire frequency, and *Amblyomma americanum* populations in east-central Alabama. *J. Vector Ecol.* **2012**, *37*, 373–381.
63. Zhang, X.; Ren, X.; Norris, D.E.; Rasgon, J.L. Distribution and infection frequency of ‘*Candidatus Rickettsia amblyommii*’ in Maryland populations of the lone star tick (*Amblyomma americanum*) and culture in an *Anopheles gambiae* mosquito cell line. *Ticks Tick-borne Dis.* **2012**, *3*, 38–42.
64. Ziemann, E.A.; Jiménez, F.A.; Nielsen, C.K. Concurrent examination of bobcats and ticks reveals high prevalence of *Cytauxzoon felis* in southern Illinois. *J. Parasitol.* **2017**, *103*, 343–348.
65. Zimmerman, R.H.; McWherter, G.R.; Bloemer, S.R. Medium-sized mammal hosts of *Amblyomma americanum* and *Dermacentor variabilis* (Acari: Ixodidae) at Land Between the Lakes, Tennessee, and effects of integrated tick management on host infestations. *J. Med. Entomol.* **1988**, *25*, 461–466.
66. Stromdahl, E.Y.; Evans, S.R.; O’Brien, J.J.; Gutierrez, A.G. Prevalence of infection in ticks submitted to the human tick test kit program of the U.S. Army Center for Health Promotion and Preventive Medicine. *J. Med. Entomol.* **2001**, *38*, 67–74.
67. Stromdahl, E.Y.; Williamson, P.C.; Kollars, T.M.; Evans, S.R.; Barry, R.K.; Vince, M.A.; Dobbs, N.A. Evidence of *Borrelia lonestari* DNA in *Amblyomma americanum* (Acari: Ixodidae) removed from humans. *J. Clin. Microbiol.* **2003**, *41*, 5557–5562.
68. Stromdahl, E.Y.; Jiang, J.; Vince, M.; Richards, A.L. Infrequency of *Rickettsia rickettsii* in *Dermacentor variabilis* removed from humans, with comments on the role of other human-biting ticks associated with spotted fever group Rickettsiae in the United States. *Vector Borne Zoonotic Dis.* **2011**, *11*, 969–977.
69. Allerdice, M.E.J.; Beati, L.; Yaglom, H.; Lash, R.R.; Delgado-de la Mora, J.; Licona-Enriquez, J.D.; Delgado-de la Mora, D.; Paddock, C.D. *Rickettsia parkeri* (Rickettsiales: Rickettsiaceae) detected in ticks of the *Amblyomma maculatum* (Acari: Ixodidae) group collected from multiple locations in southern Arizona. *J. Med. Entomol.* **2017**, *54*, 1743–1749.
70. Castellanos, A.A.; Medeiros, M.C.I.; Hamer, G.L.; Morrow, M.E.; Eubanks, M.D.; Teel, P.D.; Hamer, S.A.; Light, J.E. Decreased small mammal and on-host tick abundance in association with invasive red imported fire ants (*Solenopsis invicta*). *Biol. Lett.* **2016**, *12*.
71. Corn, J.L.; Duhaime, R.A.; Alfred, J.T.; Mertins, J.W.; Leland, B.R.; Sramek, R.L.; Moczygemba, J.D.; Shaw, D.W. Survey for ticks on feral swine within a cattle fever tick-infested landscape in Texas, U.S.A. *Syst. Appl. Acarol.* **2016**, *21*, 1564–1570.
72. Florin, D.A.; Jiang, J.; Robbins, R.G.; Richards, A.L. Infection of the Gulf Coast tick, *Amblyomma maculatum* (Acari: Ixodidae), with *Rickettsia parkeri* : first report from the State of Delaware. *Syst. Appl. Acarol.* **2013**, *18*, 27–29.
73. Forrester, D.J.; McLaughlin, G.S.; Telford, S.R.; Foster, G.W.; Mccown, J.W. Ectoparasites (Acari, Mallophaga, Anoplura, Diptera) of white-tailed deer, *Odocoileus virginianus* from Southern Florida. *J. Med. Entomol.* **1996**, *33*, 96–101.
74. Goddard, J.; Norment, B.R. Notes on the geographical distribution of the Gulf Coast tick, *Amblyomma maculatum* (Koch) [Acari, Ixodidae]. *Entomological news.* **1983**, *94*, 103–104.
75. Goddard, J.; Paddock, C.D. Observations on distribution and seasonal activity of the Gulf Coast tick in Mississippi. *J. Med. Entomol.* **2005**, *42*, 176–179.
76. Goddard, J.; Varela-Stokes, A.; Schneider, J.C. Observations on questing activity of adult Gulf Coast ticks, *Amblyomma maculatum* Koch (Acari: Ixodidae), in Mississippi, U.S.A. *Syst. Appl. Acarol.* **2011**, *16*, 195–200.
77. Kinsey, A.A.; Durden, L.A.; Oliver, J.H. Tick infestations of birds in coastal Georgia and Alabama. *J. Parasitol.* **2000**, *86*, 251–254.
78. Lee, J.K.; Moraru, G.M.; Stokes, J.V.; Wills, R.W.; Mitchell, E.; Unz, E.; Moore-Henderson, B.; Harper, A.B.; Varela-Stokes, A.S. *Rickettsia parkeri* and “*Candidatus Rickettsia andeanae*” in questing *Amblyomma maculatum* (Acari: Ixodidae) From Mississippi. *J. Med. Entomol.* **2017**, *54*, 476–480.

79. Merrill, M.M.; Boughton, R.K.; Lord, C.C.; Saylor, K.A.; Wight, B.; Anderson, W.M.; Wisely, S.M. Wild pigs as sentinels for hard ticks: A case study from south-central Florida. *Int. J. Parasitol. Parasites Wildl.* **2018**, *7*, 161–170.
80. Nadolny, R.M.; Gaff, H.D. Natural history of *Amblyomma maculatum* in Virginia. *Ticks Tick-borne Dis.* **2018**, *9*, 188–195.
81. Nadolny, R.; Gaff, H.; Carlsson, J.; Gauthier, D. Comparative population genetics of two invading ticks: evidence of the ecological mechanisms underlying tick range expansions. *Infect. Genet. Evol.* **2015**, *35*, 153–162.
82. Paddock, C.D.; Fournier, P.-E.; Sumner, J.W.; Goddard, J.; Elshenawy, Y.; Metcalfe, M.G.; Loftis, A.D.; Varela-Stokes, A. Isolation of *Rickettsia parkeri* and identification of a novel spotted fever group *Rickettsia* sp. from Gulf Coast ticks (*Amblyomma maculatum*) in the United States. *Appl. Environ. Microbiol.* **2010**, *76*, 2689–2696.
83. Polsomboon, S.; Hoel, D.F.; Murphy, J.R.; Linton, Y.-M.; Motoki, M.; Robbins, R.G.; Bautista, K.; Briceño, I.; Achee, N.L.; Grieco, J.P.; et al. Molecular Detection and Identification of Rickettsia Species in Ticks (Acari: Ixodidae) Collected From Belize, Central America. *J. Med. Entomol.* **2017**, *54*, 1718–1726.
84. Portugal III, J.S.; Goddard, J. Collections of immature *Amblyomma maculatum* Koch (Acari: Ixodidae) from Mississippi, U.S.A. *Syst. Appl. Acarol.* **2015**, *20*, 20–24.
85. Pung, O.J.; Durden, L.A.; Patrick, M.J.; Conyers, T.; Mitchell, L.R. Ectoparasites and gastrointestinal helminths of southern flying squirrels in southeast Georgia. *J. Parasitol.* **2000**, *86*, 1051–1055.
86. Rivera-Páez, F.A.; Labruna, M.B.; Martins, T.F.; Perez, J.E.; Castaño-Villa, G.J.; Ossa-López, P.A.; Gil, C.A.; Sampieri, B.R.; Aricapa-Giraldo, H.J.; Camargo-Mathias, M.I. Contributions to the knowledge of hard ticks (Acari: Ixodidae) in Colombia. *Ticks Tick Borne Dis.* **2018**, *9*, 57–66.
87. Rodriguez, J.E.; Hamer, S.A.; Castellanos, A.A.; Light, J.E. Survey of a rodent and tick community in east-central Texas. *Southeastern Naturalist* **2015**, *14*, 415–424.
88. Rodríguez-Vivas, R.I.; Apanaskevich, D.A.; Ojeda-Chi, M.M.; Trinidad-Martínez, I.; Reyes-Novelo, E.; Esteve-Gassent, M.D.; Pérez de León, A.A. Ticks collected from humans, domestic animals, and wildlife in Yucatan, Mexico. *Vet. Parasitol.* **2016**, *215*, 106–113.
89. Sleeba, S.B.; Teel, P.D.; Longnecker, M.T.; Strey, O.F. Host selection by questing female *Amblyomma maculatum* Koch, to cattle with feeding male ticks in southern Texas. *Vet. Parasitol.* **2010**, *172*, 105–108.
90. Snoddy, E.L.; Cooney, J.C. A new distribution record for the Gulf Coast tick, *Amblyomma maculatum* (Acari: Ixodidae). *J. Med. Entomol.* **1984**, *21*, 242–242.
91. Teel, P.D.; Hopkins, S.W.; Donahue, W.A.; Strey, O.F. Population dynamics of immature *Amblyomma maculatum* (Acari: Ixodidae) and other ectoparasites on meadowlarks and northern bobwhite quail resident to the coastal prairie of Texas. *J. Med. Entomol.* **1998**, *35*, 483–488.
92. Trout, R.T.; Steelman, C.D.; Szalanski, A.L.; Loftin, K. Establishment of *Amblyomma maculatum* (gulf coast tick) in Arkansas, U.S.A. *The Florida Entomologist* **2010**, *93*, 120–122.
93. Wiedl, S.C. A new distribution record for *Amblyomma maculatum* (Acari: Ixodidae). *J. Med. Entomol.* **1981**, *18*, 170–170.
94. Aguirre, A.A.R.; Garcia, M.V.; Costa, I.N. da; Csordas, B.G.; Rodrigues, V. da S.; Medeiros, J.F.; Andreotti, R. New records of tick-associated spotted fever group *Rickettsia* in an Amazon-Savannah ecotone, Brazil. *Ticks and Tick-borne Dis.* **2018**, *9*, 1038–1044.
95. Beck, D.L.; Zavala, J.; Montalvo, E.O.; Quintana, F.G. Meteorological indicators for *Amblyomma cajennense* and population dynamics in the Tamaulipan Biotic Province in Texas. *J. Vector Ecol.* **2011**, *36*, 135–146.
96. Brites-Neto, J.; Nieri-Bastos, F.A.; Brasil, J.; Duarte, K.M.R.; Martins, T.F.; Veríssimo, C.J.; Barbieri, A.R.M.; Labruna, M.B. Environmental infestation and rickettsial infection in ticks in an area endemic for Brazilian spotted fever. *Rev. Bras. Parasitol. Vet.* **2013**, *22*, 367–372.
97. Dantas-Torres, F. Ticks on domestic animals in Pernambuco, Northeastern Brazil. *Rev. Bras. Parasitol. Vet.* **2009**, *18*, 22–28.
98. de Almeida, R.F.C.; Garcia, M.V.; Cunha, R.C.; Matias, J.; e Silva, E.A.; de Fatima Cepa Matos, M.; Andreotti, R. Ixodid fauna and zoonotic agents in ticks from dogs: first report of *Rickettsia rickettsii* in *Rhipicephalus sanguineus* in the state of Mato Grosso do Sul, mid-western Brazil. *Exp. Appl. Acarol.* **2013**, *60*, 63–72.
99. De Campos Pereira, M.; Szabó, M.P.J.; Bechara, G.H.; Matushima, E.R.; Duarte, J.M.B.; Rechav, Y.; Fielden, L.; Keirans, J.E. Ticks (Acari: Ixodidae) associated with wild animals in the Pantanal region of Brazil. *J. Med. Entomol.* **2000**, *37*, 979–983.
100. Eremeeva, M.E.; Berganza, E.; Suarez, G.; Govern, L.; Dueger, E.; Castillo, L.; Reyes, L.; Wikswo, M.E.; Abramowicz, K.F.; Dasch, G.A.; et al. Investigation of an outbreak of rickettsial febrile illness in Guatemala, 2007. *Int. J. Infect. Dis.* **2013**, *17*, e304–e311.
101. Heukelbach, J.; Frank, R.; Ariza, L.; de Sousa Lopes, Í.; de Assis e Silva, A.; Borges, A.C.; Limongi, J.E.; de Alencar, C.H.M.; Klimpel, S. High prevalence of intestinal infections and ectoparasites in dogs, Minas Gerais State (southeast Brazil). *Parasitology Research* **2012**, *111*, 1913–1921.
102. Labruna, M.B.; Kasai, N.; Ferreira, F.; Faccini, J.L.H.; Gennari, S.M. Seasonal dynamics of ticks (Acari: Ixodidae) on horses in the state of São Paulo, Brazil. *Vet. Parasitol.* **2002**, *105*, 65–77.

103. Linthicum, K.J.; Logan, T.M.; Bailey, C.L.; Gordon, S.W.; Peters, C.J.; Monath, T.P.; Osorio, J.; Francly, D.B.; Mclean, R.G.; Leduc, J.W.; et al. Venezuelan equine encephalomyelitis virus infection in and transmission by the tick *Amblyomma cajennense* (Arachnida: Ixodidae). *J. Med. Entomol.* **1991**, *28*, 405–409.
104. Machado-Ferreira, E.; Piesman, J.; Zeidner, N.S.; Soares, C.A.. A prevalent alpha-proteobacterium *Paracoccus* sp. in a population of the Cayenne ticks (*Amblyomma cajennense*) from Rio de Janeiro, Brazil. *Genet. Mol. Biol.* **2012**, *35*, 862–867.
105. Machado-Ferreira, E.; Dietrich, G.; Hojgaard, A.; Levin, M.; Piesman, J.; Zeidner, N.S.; Soares, C.A.G. *Coxiella* symbionts in the Cayenne tick *Amblyomma cajennense*. *Microb. Ecol.* **2011**, *62*, 134–142.
106. Mangold, A.J.; Aguirre, D.H.; Gaido, A.B.; Guglielmone, A.A. Seasonal variation of ticks (ixodidae) in *Bos taurus* × *Bos indicus* cattle under rotational grazing in forested and deforested habitats in northwestern Argentina. *Vet. Parasitol.* **1994**, *54*, 389–395.
107. Martins, T.F.; Barbieri, A.R.M.; Costa, F.B.; Terassini, F.A.; Camargo, L.M.A.; Peterka, C.R.L.; de C. Pacheco, R.; Dias, R.A.; Nunes, P.H.; Marcili, A.; et al. Geographical distribution of *Amblyomma cajennense* (*sensu lato*) ticks (Parasitiformes: Ixodidae) in Brazil, with description of the nymph of *A. cajennense* (*sensu stricto*). *Parasit. Vectors* **2016**, *9*.
108. Martins, T.F.; Furtado, M.M.; Jácomo, A.T.D.A.; Silveira, L.; Sollmann, R.; Tôorres, N.M.; Labruna, M.B. Ticks on free-living wild mammals in Emas National Park, Goiás State, central Brazil. *saaa* **2011**, *16*, 201–207.
109. Mastropaolo, M.; Nava, S.; Guglielmone, A.A.; Mangold, A.J. Biological differences between two allopatric populations of *Amblyomma cajennense* (Acari: Ixodidae) in Argentina. *Exp. Appl. Acarol.* **2011**, *53*, 371–375.
110. Medri, Í.M.; Martins, J.R.; Doyle, R.L.; Mourão, G.; Marinho-Filho, J. Ticks (Acari: Ixodidae) from yellow armadillo, *Euphractus sexcinctus* (Cingulata: Dasypodidae), in Brazil's Pantanal wetlands. *Neotrop. Entomol.* **2010**, *39*, 823–825.
111. Miranda, J.; Mattar, S. Molecular detection of *Rickettsia bellii* and *Rickettsia* sp. strain Colombianensi in ticks from Cordoba, Colombia. *Ticks Tick-borne Dis.* **2014**, *5*, 208–212.
112. Ogrzewalska, M.; Literak, I.; Martins, T.F.; Labruna, M.B. Rickettsial infections in ticks from wild birds in Paraguay. *Ticks Tick-borne Dis.* **2014**, *5*, 83–89.
113. Ogrzewalska, M.; Pacheco, R.C.; Uezu, A.; Richtzenhain, L.J.; Ferreira, F.; Labruna, M.B. Ticks (Acari: Ixodidae) infesting birds in an Atlantic rain forest region of Brazil. *J. Med. Entomol.* **2009**, *46*, 1225–1229.
114. Oliveira, P.R.; Borges, L.M.F.; Leite, R.C.; Freitas, C.M.V. Seasonal dynamics of the Cayenne tick, *Amblyomma cajennense* on horses in Brazil. *Med. Vet. Entomol.* **2003**, *17*, 412–416.
115. Oliveira, P.R.; Borges, L.M.; Lopes, C.M.; Leite, R.C. Population dynamics of the free-living stages of *Amblyomma cajennense* (Fabricius, 1787) (Acari: ixodidae) on pastures of Pedro Leopoldo, Minas Gerais State, Brazil. *Vet. Parasitol.* **2000**, *92*, 295–301.
116. Pacheco, R.C.; Moraes-Filho, J.; Guedes, E.; Silveira, I.; Richtzenhain, L.J.; Leite, R.C.; Labruna, M.B. Rickettsial infections of dogs, horses and ticks in Juiz de Fora, southeastern Brazil, and isolation of *Rickettsia rickettsii* from *Rhipicephalus sanguineus* ticks. *Med. Vet. Entomol.* **2011**, *25*, 148–155.
117. Pinheiro, M. da C.; Lourenço, E.C.; Patrício, P.M.P.; Sá-Hungaro, I.J.B. de; Famadas, K.M. Free-living ixodid ticks in an urban Atlantic Forest fragment, state of Rio de Janeiro, Brazil. *Rev. Bras. Parasitol. Vet.* **2014**, *23*, 264–268.
118. Rojas, R.; Marini, M.Â.; Coutinho, M.T.Z. Wild birds as hosts of *Amblyomma cajennense* (Fabricius, 1787) (Acari: Ixodidae). *Mem. Inst. Oswaldo Cruz* **1999**, *94*, 315–322.
119. Sanders, D.M.; Parker, J.E.; Walker, W.W.; Buchholz, M.W.; Blount, K.; Kiel, J.L. Field collection and genetic classification of tick-borne Rickettsiae and Rickettsiae-like pathogens from South Texas: *Coxiella burnetii* isolated from field-collected *Amblyomma cajennense*. *Ann. N. Y. Acad. Sci.* **2008**, *1149*, 208–211.
120. Saraiva, D.G.; Fournier, G.F.S.R.; Martins, T.F.; Leal, K.P.G.; Vieira, F.N.; Câmara, E.M.V.C.; Costa, C.G.; Onofrio, V.C.; Barros-Battesti, D.M.; Guglielmone, A.A.; et al. Ticks (Acari: Ixodidae) associated with small terrestrial mammals in the state of Minas Gerais, southeastern Brazil. *Exp. Appl. Acarol.* **2012**, *58*, 159–166.
121. Silveira, I.; Martins, T.F.; Olegário, M.M.; Peterka, C.; Guedes, E.; Ferreira, F.; Labruna, M.B. Rickettsial infection in animals, humans and ticks in Paulicéia, Brazil. *Zoonoses and Public Health* **2015**, *62*, 525–533.
122. Spolidorio, M.G.; Andreoli, G.S.; Martins, T.F.; Brandão, P.E.; Labruna, M.B. Rickettsial infection in ticks collected from road-killed wild animals in Rio de Janeiro, Brazil. *J. Med. Entomol.* **2012**, *49*, 1510–1514.
123. Szabó, M.P.J.; Olegário, M.M.M.; Santos, A.L.Q. Tick fauna from two locations in the Brazilian savannah. *Exp. Appl. Acarol.* **2007**, *43*, 73.
124. Szabó, M.P.J.; Castro, M.B.; Ramos, H.G.C.; Garcia, M.V.; Castagnolli, K.C.; Pinter, A.; Veronez, V.A.; Magalhães, G.M.; Duarte, J.M.B.; Labruna, M.B. Species diversity and seasonality of free-living ticks (Acari: Ixodidae) in the natural habitat of wild Marsh deer (*Blastocerus dichotomus*) in Southeastern Brazil. *Vet. Parasitol.* **2007**, *143*, 147–154.
125. Szabó, M.P.J.; Labruna, M.B.; Pereira, M.C.; Duarte, J.M.B. Ticks (Acari: Ixodidae) on wild marsh-deer (*Blastocerus dichotomus*) from southeast Brazil: infestations before and after habitat loss. *J. Med. Entomol.* **2003**, *40*, 268–274.
126. Toledo, R.S.; Tamekuni, K.; Filho, M.F.S.; Haydu, V.B.; Barbieri, A.R.M.; Hiltel, A.C.; Pacheco, R.C.; Labruna, M.B.; Dumler, J.S.; Vidotto, O. Infection by spotted fever Rickettsiae in people, dogs, horses and ticks in Londrina, Parana State, Brazil. *Zoonoses and Public Health* **2011**, *58*, 416–423.

127. Toledo, R.S.; Tamekuni, K.; Silva Filho, M. de F.; Haydu, V.B.; Pacheco, R.C.; Labruna, M.B.; Dumler, J.S.; Vidotto, O. Study of infection by Rickettsiae of the spotted fever group in humans and ticks in an urban park located in the City of Londrina, State of Paraná, Brazil. *Rev. Soc. Bras. Med. Trop.* **2011**, *44*, 313–317.
128. Veronez, V.A.; Freitas, B.Z.; Olegário, M.M.M.; Carvalho, W.M.; Pascoli, G.V.T.; Thorga, K.; Garcia, M.V.; Szabó, M.P.J. Ticks (Acari: Ixodidae) within various phytophysiognomies of a Cerrado reserve in Uberlândia, Minas Gerais, Brazil. *Exp. Appl. Acarol.* **2009**, *50*, 169.
129. Beck, D.L.; Orozco, J.P. Diurnal questing behavior of *Amblyomma mixtum* (Acari: Ixodidae). *Exp. Appl. Acarol.* **2015**, *66*, 613–621.
130. Coronel-Benedett, K.C.; Ojeda-Robertos, N.F.; González-Garduño, R.; Ibañez, F.M.; Rodríguez-Vivas, R.I. Prevalence, intensity and population dynamics of hard ticks (Acari: Ixodidae) on sheep in the humid tropics of Mexico. *Exp. Appl. Acarol.* **2018**, *74*, 99–105.
131. García S, G.G.; Castro, A.M.; Rodríguez, I.; Bermúdez C, S.E. Ixodid ticks of *Hydrochoerus isthmius* Goldman, 1912 (Rodentia: Caviidae) in Panama. *saaa* **2014**, *19*, 404–408.
132. Novakova, M.; Literak, I.; Chevez, L.; Martins, T.F.; Ogrzewalska, M.; Labruna, M.B. Rickettsial infections in ticks from reptiles, birds and humans in Honduras. *Ticks Tick-borne Dis.* **2015**, *6*, 737–742.
133. Sánchez-Montes, S.; Ríos-Muñoz, C.A.; Espinosa-Martínez, D.V.; Guzmán-Cornejo, C.; Berzunza-Cruz, M.; Becker, I. First report of “*Candidatus Rickettsia amblyommii*” in west coast of Mexico. *Ticks Tick-borne Dis.* **2016**, *7*, 1139–1145.
134. Troyo, A.; Moreira-Soto, R.D.; Calderon-Arguedas, Ó.; Mata-Somarribas, C.; Ortiz-Tello, J.; Barbieri, A.R.M.; Avendaño, A.; Vargas-Castro, L.E.; Labruna, M.B.; Hun, L.; et al. Detection of rickettsiae in fleas and ticks from areas of Costa Rica with history of spotted fever group rickettsioses. *Ticks Tick-borne Dis.* **2016**, *7*, 1128–1134.
